# Supplementary material for: Human-modified habitats facilitate forest-dwelling populations of an invasive predator, Vulpes vulpes
Source: PubMed Central journal article supplement (PMC5612948; doi:10.1038/s41598-017-12464-7), 2017-09-25
Supplement: 41598_2017_12464_MOESM1_ESM.pdf [file 41598_2017_12464_MOESM1_ESM.pdf]

**SUPPLEMENTARY INFORMATION**

Human-modified habitats facilitate forest-dwelling  
populations of an invasive predator, *Vulpes vulpes*

Hradsky BA\*, Robley A, Alexander R, Ritchie EG, York A, Di Stefano J.

\* [hradskyb@unimelb.edu.au](mailto:hradskyb@unimelb.edu.au)

**Supplementary Table S1.** Availability of habitat types to individual red fox *Vulpes vulpes*, Victoria, Australia. Numbers show the percentage of each habitat type within a circle defined by the fox's barycentre and maximum ranging distance (see main text for details).

|                                        |               | LADY <sup>♀</sup> | VIKI <sup>♀</sup> | FERN <sup>♀</sup> | DUST <sup>♂</sup> | 6010 <sup>♂</sup> | 4780 <sup>♀</sup> | 4190 <sup>♀</sup> | GULY <sup>♂</sup> | SAND <sup>♂</sup> | REED <sup>♂</sup> | CINN <sup>♀</sup> | 6410 <sup>♀</sup> | RUSH <sup>♂</sup> | RUST <sup>♂</sup> | 5590 <sup>♀</sup> | 4590 <sup>♂</sup> | GAMY <sup>♂</sup> | DOUG <sup>♂</sup> | 4400 <sup>♀</sup> |
|----------------------------------------|---------------|-------------------|-------------------|-------------------|-------------------|-------------------|-------------------|-------------------|-------------------|-------------------|-------------------|-------------------|-------------------|-------------------|-------------------|-------------------|-------------------|-------------------|-------------------|-------------------|
| Long-unburnt forest (>35 y post-fire)  | heath         | 0                 | 0                 | 0                 | 0                 | 0                 | 0                 | 0                 | 0                 | 0                 | 0                 | 0                 | 2                 | 1                 | 6                 | 0                 | 5                 | 1                 | 0                 | 1                 |
|                                        | eucalypt      | 35                | 25                | 0                 | 60                | 1                 | 30                | 35                | 10                | 0                 | 0                 | 6                 | 32                | 2                 | 11                | 3                 | 38                | 5                 | 6                 | 15                |
|                                        | riparian      | 29                | 48                | 0                 | 22                | 0                 | 0                 | 0                 | 2                 | 0                 | 0                 | 3                 | 0                 | 1                 | 4                 | 1                 | 0                 | 1                 | 1                 | 0                 |
| Mid-age forest (7-35 y post-fire)      | heath         | 0                 | 0                 | 0                 | 0                 | 0                 | 0                 | 0                 | 19                | 6                 | 6                 | 4                 | 0                 | 8                 | 2                 | 0                 | 0                 | 0                 | 5                 | 0                 |
|                                        | eucalypt      | 3                 | 0                 | 13                | 0                 | 27                | 6                 | 21                | 35                | 27                | 31                | 0                 | 17                | 0                 | 3                 | 43                | 1                 | 1                 | 12                | 3                 |
|                                        | riparian      | 3                 | 0                 | 7                 | 0                 | 0                 | 0                 | 0                 | 8                 | 6                 | 6                 | 0                 | 0                 | 0                 | 0                 | 5                 | 0                 | 1                 | 6                 | 0                 |
| Young forest (1-7 y post-fire)         | heath         | 0                 | 0                 | 0                 | 0                 | 0                 | 0                 | 0                 | 0                 | 12                | 8                 | 13                | 0                 | 18                | 3                 | 0                 | 0                 | 4                 | 0                 | 0                 |
|                                        | eucalypt      | 22                | 15                | 51                | 10                | 64                | 53                | 0                 | 1                 | 17                | 16                | 27                | 10                | 14                | 19                | 6                 | 8                 | 19                | 4                 | 2                 |
|                                        | riparian      | 2                 | 8                 | 23                | 1                 | 0                 | 0                 | 0                 | 0                 | 4                 | 3                 | 5                 | 0                 | 4                 | 1                 | 0                 | 0                 | 2                 | 1                 | 0                 |
| Recently burnt forest (<1 y post-fire) | heath         | 0                 | 0                 | 0                 | 0                 | 0                 | 0                 | 2 <sup>a</sup>    | 0                 | 0                 | 1                 | 14                | 3 <sup>a</sup>    | 10                | 4                 | 0                 | 1                 | 4                 | 2                 | 1                 |
|                                        | eucalypt      | 0                 | 0                 | 0                 | 0                 | 0                 | 0                 | 27 <sup>a</sup>   | 0                 | 6                 | 4                 | 0                 | 6 <sup>a</sup>    | 0                 | 1                 | 0                 | 0                 | 4                 | 6                 | 1                 |
|                                        | riparian      | 0                 | 0                 | 0                 | 0                 | 0                 | 0                 | 0                 | 0                 | 0                 | 0                 | 1                 | 0                 | 0                 | 1                 | 0                 | 0                 | 1                 | 2                 | 0                 |
|                                        | edge (forest) | 0                 | 1                 | 1                 | 0                 | 0                 | 0                 | 1                 | 6                 | 5                 | 5                 | 4                 | 2                 | 7                 | 6                 | 3                 | 3                 | 9                 | 4                 | 5                 |
| Other                                  | edge (open)   | 0                 | 0                 | 0                 | 0                 | 0                 | 0                 | 0                 | 3                 | 2                 | 3                 | 4                 | 1                 | 7                 | 5                 | 3                 | 2                 | 8                 | 3                 | 6                 |
|                                        | plantation    | 0                 | 0                 | 0                 | 0                 | 0                 | 0                 | 3                 | 0                 | 0                 | 0                 | 0                 | 13                | 0                 | 0                 | 0                 | 23                | 0                 | 6                 | 12                |
|                                        | reservoir     | 0                 | 0                 | 0                 | 1                 | 0                 | 4                 | 0                 | 2                 | 2                 | 2                 | 0                 | 1                 | 1                 | 0                 | 2                 | 1                 | 1                 | 2                 | 6                 |
|                                        | farm stream   | 0                 | 0                 | 0                 | 0                 | 0                 | 0                 | 0                 | 0                 | 0                 | 0                 | 3                 | 0                 | 5                 | 3                 | 2                 | 1                 | 5                 | 2                 | 2                 |
|                                        | farmland      | 0                 | 0                 | 0                 | 0                 | 0                 | 0                 | 0                 | 7                 | 3                 | 3                 | 8                 | 4                 | 16                | 16                | 30                | 11                | 22                | 29                | 41                |
|                                        | road          | 3                 | 4                 | 4                 | 5                 | 8                 | 7                 | 10                | 6                 | 7                 | 8                 | 6                 | 8                 | 6                 | 11                | 4                 | 7                 | 9                 | 8                 | 5                 |
|                                        | urban         | 0                 | 0                 | 0                 | 0                 | 0                 | 0                 | 0                 | 0                 | 3                 | 3                 | 0                 | 0                 | 1                 | 2                 | 0                 | 0                 | 4                 | 1                 | 1                 |

<sup>a</sup> a prescribed burn was conducted within these animals' available habitat during the study, converting a proportion of the heathy and eucalypt forest from >35 year to <1 year post-fire. Proportions relate to post-fire availability.

**Supplementary Table S2.** [excel spreadsheet]

**Supplementary Table S3.** [excel spreadsheet]

**Supplementary Table S4.** Odds ratio matrices for fine-scale habitat selection analysis by individual red fox *Vulpes vulpes* during day and night. Habitat types are listed in order from least to most strongly selected habitat. Values in the matrix of habitat types indicate the estimated odds ratio (LCL, UCL) for the habitat type in the row relative to the habitat type in the column. An odds ratio of 1 indicates equal selection, values < 1 indicate that the habitat type in the column is selected less than the habitat in the row, values >1 indicated that the habitat type in the column is more strongly selected. \* indicates where the confidence limits do not overlap one.

## Fox DUST

*day* ( $n_{\text{observed}} = 123$ )

| variable        | avail. | Riparian (>35y)  | Reservoir/dam   | Eucalypt (>35y) | Road            | Edge (forest)   |
|-----------------|--------|------------------|-----------------|-----------------|-----------------|-----------------|
| Riparian (>35y) | 0.20   | NA               | 0.7 (0.1, 3.4)  | 0.4 (0.2, 0.8)* | 0.3 (0.1, 0.9)* | 0.1 (0, 0.4)*   |
| Reservoir/dam   | 0.02   | 1.4 (0.3, 6.8)   | NA              | 0.6 (0.1, 2.6)  | 0.5 (0.1, 2.4)  | 0.2 (0, 1.2)    |
| Eucalypt (>35y) | 0.71   | 2.4 (1.3, 4.5)*  | 1.7 (0.4, 7.3)  | NA              | 0.8 (0.4, 1.7)  | 0.4 (0.1, 0.9)* |
| Road            | 0.05   | 3 (1.2, 7.7)*    | 2.1 (0.4, 10.7) | 1.2 (0.6, 2.7)  | NA              | 0.4 (0.1, 1.4)  |
| Edge (forest)   | 0.02   | 6.8 (2.2, 20.5)* | 4.7 (0.9, 26.3) | 2.8 (1.1, 7.3)* | 2.3 (0.7, 7.2)  | NA              |

*night* ( $n_{\text{observed}} = 93$ )

| variable        | avail. | Riparian (>35y) | Eucalypt (>35y) | Reservoir/dam  | Edge (forest)  | Road           |
|-----------------|--------|-----------------|-----------------|----------------|----------------|----------------|
| Riparian (>35y) | 0.19   | NA              | 0.8 (0.4, 1.5)  | 0.5 (0.2, 1.2) | 0.4 (0.1, 1.4) | 0.4 (0.2, 1)   |
| Eucalypt (>35y) | 0.66   | 1.2 (0.7, 2.3)  | NA              | 0.6 (0.2, 1.3) | 0.5 (0.2, 1.6) | 0.5 (0.2, 1.1) |
| Reservoir/dam   | 0.06   | 2.2 (0.9, 5.7)  | 1.8 (0.8, 4.2)  | NA             | 0.9 (0.2, 3.6) | 0.9 (0.3, 2.6) |
| Edge (forest)   | 0.03   | 2.4 (0.7, 8)    | 1.9 (0.6, 6)    | 1.1 (0.3, 4.1) | NA             | 1.0 (0.3, 3.5) |
| Road            | 0.07   | 2.4 (1, 5.7)    | 2 (0.9, 4.1)    | 1.1 (0.4, 3.1) | 1.0 (0.3, 3.5) | NA             |

**Fox 4780***day* (n<sub>observed</sub> = 285)

| variable         | avail. | Eucalypt (>35y)   | Road             | Eucalypt (7-35y) | Eucalypt (1-7y) | Reservoir/dam   |
|------------------|--------|-------------------|------------------|------------------|-----------------|-----------------|
| Eucalypt (>35y)  | 0.07   | NA                | 0.3 (0.1, 1)     | 0.2 (0, 0.8)*    | 0.1 (0, 0.5)*   | 0 (0, 0.1)*     |
| Road             | 0.05   | 3.6 (1, 13.9)     | NA               | 0.7 (0.2, 2.1)   | 0.5 (0.3, 1.1)  | 0.1 (0.1, 0.3)* |
| Eucalypt (7-35y) | 0.03   | 5.2 (1.3, 21.4)*  | 1.4 (0.5, 4.2)   | NA               | 0.8 (0.3, 1.8)  | 0.2 (0.1, 0.5)* |
| Eucalypt (1-7y)  | 0.76   | 6.8 (2.1, 21.6)*  | 1.9 (0.9, 3.9)   | 1.3 (0.6, 3)     | NA              | 0.3 (0.2, 0.4)* |
| Reservoir/dam    | 0.1    | 24.9 (7.6, 82.1)* | 6.9 (3.1, 15.1)* | 4.8 (2, 11.7)*   | 3.7 (2.5, 5.3)* | NA              |

*night* (n<sub>observed</sub> = 561)

| variable         | avail. | Eucalypt (>35y)     | Eucalypt (7-35y) | Road            | Eucalypt (1-7y) | Reservoir/dam   |
|------------------|--------|---------------------|------------------|-----------------|-----------------|-----------------|
| Eucalypt (>35y)  | 0.08   | NA                  | 0.3 (0, 1.7)     | 0.1 (0, 0.2)*   | 0 (0, 0.2)*     | 0 (0, 0.1)*     |
| Eucalypt (7-35y) | 0.03   | 3.6 (0.6, 21.9)     | NA               | 0.2 (0.1, 0.6)* | 0.2 (0.1, 0.5)* | 0.1 (0, 0.2)*   |
| Road             | 0.06   | 19 (4.5, 80.3)*     | 5.3 (1.6, 17.5)* | NA              | 0.8 (0.6, 1.2)  | 0.3 (0.2, 0.5)* |
| Eucalypt (1-7y)  | 0.71   | 22.7 (5.6, 91.8)*   | 6.3 (2, 19.9)*   | 1.2 (0.8, 1.8)  | NA              | 0.4 (0.3, 0.5)* |
| Reservoir/dam    | 0.12   | 61.7 (15.1, 252.4)* | 17.1 (5.3, 55)*  | 3.2 (2.1, 5.1)* | 2.7 (2.1, 3.5)* | NA              |

**Fox 4190**

**day (pre-fire)** (n<sub>observed</sub> = 217)

| variable               | avail. | Eucalypt (7-35y) | Road            | Eucalypt (>35y) | Eucalypt (will be <1y) |
|------------------------|--------|------------------|-----------------|-----------------|------------------------|
| Eucalypt (7-35y)       | 0.09   | NA               | 0.2 (0.1, 0.6)* | 0.2 (0.1, 0.5)* | 0.1 (0, 0.4)*          |
| Road                   | 0.12   | 5.3 (1.8, 15.5)* | NA              | 0.9 (0.6, 1.5)  | 0.7 (0.4, 1.2)         |
| Eucalypt (>35y)        | 0.44   | 5.9 (2.1, 16.3)* | 1.1 (0.7, 1.8)  | NA              | 0.8 (0.5, 1.2)         |
| Eucalypt (will be <1y) | 0.34   | 7.4 (2.7, 20.8)* | 1.4 (0.9, 2.3)  | 1.3 (0.9, 1.9)  | NA                     |

**day (post-fire)** (n<sub>observed</sub> = 42)

| variable                      | avail. | Road           | Eucalypt (<1y) | Eucalypt (>35y) |
|-------------------------------|--------|----------------|----------------|-----------------|
| Eucalypt (7-35y) <sup>a</sup> | 0.10   |                |                |                 |
| Road                          | 0.13   | NA             | 0.5 (0.1, 1.8) | 0.4 (0.1, 1.6)  |
| Eucalypt (<1y)                | 0.53   | 1.9 (0.6, 6.8) | NA             | 0.9 (0.4, 2)    |
| Eucalypt (>35y)               | 0.34   | 2.2 (0.6, 8)   | 1.1 (0.5, 2.6) | NA              |

<sup>a</sup> This habitat was available but never used post-fire and therefore had to be dropped from the analysis

**night (pre-fire)** (n<sub>observed</sub> = 320)

| variable               | avail. | Eucalypt (7-35y) | Eucalypt (>35y) | Eucalypt (will be <1y) | Road            |
|------------------------|--------|------------------|-----------------|------------------------|-----------------|
| Eucalypt (7-35y)       | 0.15   | NA               | 0.4 (0.2, 0.7)* | 0.4 (0.2, 0.6)*        | 0.2 (0.1, 0.3)* |
| Eucalypt (>35y)        | 0.31   | 2.5 (1.4, 4.2)*  | NA              | 0.9 (0.6, 1.3)         | 0.4 (0.3, 0.6)* |
| Eucalypt (will be <1y) | 0.38   | 2.8 (1.6, 4.7)*  | 1.1 (0.8, 1.6)  | NA                     | 0.5 (0.3, 0.6)* |
| Road                   | 0.15   | 5.8 (3.5, 9.7)*  | 2.4 (1.7, 3.3)* | 2.1 (1.6, 2.9)*        | NA              |

**night (post-fire)** (n<sub>observed</sub> = 82)

| variable         | avail. | Eucalypt (7-35y) | Eucalypt (>35y) | Eucalypt (<1y) | Road           |
|------------------|--------|------------------|-----------------|----------------|----------------|
| Eucalypt (7-35y) | 0.16   | NA               | 0.3 (0.1, 1.2)  | 0.2 (0, 0.5)*  | 0.1 (0, 0.4)*  |
| Eucalypt (>35y)  | 0.12   | 3.8 (0.8, 17.6)  | NA              | 0.6 (0.2, 1.7) | 0.4 (0.1, 1.2) |
| Eucalypt (<1y)   | 0.59   | 6.4 (1.9, 22.4)* | 1.7 (0.6, 5)    | NA             | 0.7 (0.4, 1.3) |
| Road             | 0.14   | 9.1 (2.6, 32.1)* | 2.4 (0.8, 7)    | 1.4 (0.8, 2.5) | NA             |

## **Fox GULY**

*day* ( $n_{\text{observed}} = 4$ ) – individual analysis was not conducted due to small sample size

*night* ( $n_{\text{observed}} = 15$ ) – individual analysis was not conducted due to small sample size

## Fox SAND

*day* (n<sub>observed</sub> = 307)

| variable         | avail. | Heath (1-7y)    | Riparian (1-7y) | Eucalypt (1-7y) | Eucalypt (7-35y) | Road           | Edge (forest)  | Heath (7-35y)   | Riparian (7-35y) |
|------------------|--------|-----------------|-----------------|-----------------|------------------|----------------|----------------|-----------------|------------------|
| Heath (1-7y)     | 0.07   | NA              | 0.8 (0.4, 1.7)  | 0.7 (0.4, 1.3)  | 0.7 (0.4, 1.2)   | 0.7 (0.3, 1.3) | 0.5 (0.3, 1.1) | 0.4 (0.2, 0.9)* | 0.4 (0.2, 0.8)*  |
| Riparian (1-7y)  | 0.06   | 1.3 (0.6, 2.7)  | NA              | 0.9 (0.5, 1.6)  | 0.8 (0.5, 1.5)   | 0.8 (0.4, 1.6) | 0.7 (0.3, 1.4) | 0.6 (0.3, 1)    | 0.5 (0.2, 1)*    |
| Eucalypt (1-7y)  | 0.26   | 1.4 (0.8, 2.6)  | 1.1 (0.6, 2)    | NA              | 0.9 (0.7, 1.4)   | 0.9 (0.6, 1.5) | 0.8 (0.4, 1.3) | 0.6 (0.4, 1)*   | 0.5 (0.3, 0.9)*  |
| Eucalypt (7-35y) | 0.25   | 1.5 (0.8, 2.8)  | 1.2 (0.7, 2.2)  | 1.1 (0.7, 1.5)  | NA               | 1.0 (0.6, 1.6) | 0.8 (0.5, 1.4) | 0.7 (0.5, 1)    | 0.6 (0.3, 1)*    |
| Road             | 0.08   | 1.5 (0.8, 3)    | 1.2 (0.6, 2.3)  | 1.1 (0.7, 1.7)  | 1.0 (0.6, 1.6)   | NA             | 0.8 (0.4, 1.5) | 0.7 (0.4, 1.2)  | 0.6 (0.3, 1.1)   |
| Edge (forest)    | 0.05   | 1.9 (0.9, 3.8)  | 1.5 (0.7, 3)    | 1.3 (0.8, 2.3)  | 1.2 (0.7, 2.1)   | 1.2 (0.7, 2.3) | NA             | 0.8 (0.5, 1.5)  | 0.7 (0.4, 1.4)   |
| Heath (7-35y)    | 0.17   | 2.2 (1.2, 4.3)* | 1.8 (1, 3.3)    | 1.6 (1, 2.4)*   | 1.5 (1, 2.2)     | 1.5 (0.9, 2.5) | 1.2 (0.7, 2.1) | NA              | 0.9 (0.5, 1.5)   |
| Riparian (7-35y) | 0.05   | 2.6 (1.3, 5.4)* | 2.1 (1, 4.1)*   | 1.8 (1.1, 3.1)* | 1.7 (1, 2.9)*    | 1.7 (0.9, 3.2) | 1.4 (0.7, 2.7) | 1.2 (0.7, 2)    | NA               |

*night* (n<sub>observed</sub> = 338)

| variable         | avail. | Eucalypt (1-7y)   | Heath (1-7y)     | Heath (7-35y)   | Riparian (7-35y) | Eucalypt (7-35y) | Edge (forest)   | Riparian (1-7y) | Farmland        | Edge (open)     | Road            |
|------------------|--------|-------------------|------------------|-----------------|------------------|------------------|-----------------|-----------------|-----------------|-----------------|-----------------|
| Eucalypt (1-7y)  | 0.19   | NA                | 0.6 (0.3, 1.4)   | 0.5 (0.3, 1)*   | 0.4 (0.2, 0.9)*  | 0.3 (0.2, 0.5)*  | 0.3 (0.2, 0.6)* | 0.3 (0.1, 0.5)* | 0.2 (0.1, 0.5)* | 0.2 (0.1, 0.4)* | 0.1 (0.1, 0.2)* |
| Heath (1-7y)     | 0.06   | 1.6 (0.7, 3.4)    | NA               | 0.8 (0.4, 1.8)  | 0.7 (0.3, 1.6)   | 0.5 (0.2, 1)*    | 0.5 (0.2, 1.1)  | 0.4 (0.2, 1)*   | 0.4 (0.2, 0.9)* | 0.3 (0.1, 0.8)* | 0.1 (0.1, 0.3)* |
| Heath (7-35y)    | 0.1    | 2 (1, 3.7)*       | 1.3 (0.6, 2.8)   | NA              | 0.8 (0.4, 1.8)   | 0.6 (0.4, 1)     | 0.6 (0.3, 1.2)  | 0.5 (0.3, 1.1)  | 0.5 (0.2, 0.9)* | 0.4 (0.2, 0.9)* | 0.2 (0.1, 0.3)* |
| Riparian (7-35y) | 0.04   | 2.4 (1.1, 5.3)*   | 1.5 (0.6, 3.9)   | 1.2 (0.6, 2.7)  | NA               | 0.7 (0.4, 1.5)   | 0.7 (0.3, 1.6)  | 0.7 (0.3, 1.5)  | 0.6 (0.3, 1.3)  | 0.5 (0.2, 1.2)  | 0.2 (0.1, 0.4)* |
| Eucalypt (7-35y) | 0.2    | 3.2 (1.9, 5.4)*   | 2.1 (1, 4.3)*    | 1.7 (1, 2.8)    | 1.3 (0.7, 2.7)   | NA               | 1.0 (0.6, 1.7)  | 0.9 (0.5, 1.6)  | 0.8 (0.4, 1.4)  | 0.7 (0.4, 1.3)  | 0.3 (0.2, 0.4)* |
| Edge (forest)    | 0.08   | 3.3 (1.7, 6.1)*   | 2.1 (0.9, 4.7)   | 1.7 (0.9, 3.2)  | 1.4 (0.6, 3)     | 1.0 (0.6, 1.7)   | NA              | 0.9 (0.5, 1.8)  | 0.8 (0.4, 1.5)  | 0.7 (0.4, 1.4)  | 0.3 (0.2, 0.5)* |
| Riparian (1-7y)  | 0.05   | 3.6 (1.9, 6.9)*   | 2.3 (1, 5.2)*    | 1.8 (0.9, 3.6)  | 1.5 (0.7, 3.4)   | 1.1 (0.6, 2)     | 1.1 (0.6, 2.2)  | NA              | 0.9 (0.4, 1.8)  | 0.8 (0.4, 1.6)  | 0.3 (0.2, 0.6)* |
| Farmland         | 0.09   | 4.2 (2.1, 8.2)*   | 2.7 (1.2, 6.2)*  | 2.1 (1.1, 4.3)* | 1.8 (0.8, 3.9)   | 1.3 (0.7, 2.3)   | 1.3 (0.7, 2.4)  | 1.2 (0.6, 2.4)  | NA              | 0.9 (0.5, 1.8)  | 0.4 (0.2, 0.7)* |
| Edge (open)      | 0.05   | 4.5 (2.3, 8.9)*   | 2.9 (1.3, 6.7)*  | 2.3 (1.2, 4.6)* | 1.9 (0.8, 4.3)   | 1.4 (0.8, 2.5)   | 1.4 (0.7, 2.7)  | 1.3 (0.6, 2.6)  | 1.1 (0.6, 2.1)  | NA              | 0.4 (0.3, 0.7)* |
| Road             | 0.14   | 10.7 (6.6, 17.3)* | 6.8 (3.4, 13.6)* | 5.4 (3.3, 9.1)* | 4.4 (2.2, 8.8)*  | 3.3 (2.3, 4.7)*  | 3.3 (2, 5.3)*   | 3 (1.7, 5.2)*   | 2.5 (1.5, 4.3)* | 2.3 (1.4, 4)*   | NA              |



**Fox REED**

*day* ( $n_{\text{observed}} = 3$ ) – individual analysis was not conducted due to small sample size

*night* ( $n_{\text{observed}} = 28$ ) – individual analysis was not conducted due to small sample size

## Fox CINN

*day* (n<sub>observed</sub> = 97)

| variable        | avail. | Riparian (>35y) | Eucalypt (1-7y)  | Riparian (1-7y) | Eucalypt (>35y) | Road           | Farmland       | Heath (<1y)    | Heath (1-7y)    | Heath (7-35y)  | Edge (open)    | Edge (forest)   |
|-----------------|--------|-----------------|------------------|-----------------|-----------------|----------------|----------------|----------------|-----------------|----------------|----------------|-----------------|
| Riparian (>35y) | 0.02   | NA              | 0.7 (0.1, 5.4)   | 0.5 (0, 5)      | 0.5 (0.1, 4.6)  | 0.4 (0, 3.7)   | 0.3 (0, 2.9)   | 0.3 (0, 2.4)   | 0.3 (0, 2.1)    | 0.3 (0, 2.3)   | 0.2 (0, 2.2)   | 0.2 (0, 1.9)    |
| Eucalypt (1-7y) | 0.26   | 1.4 (0.2, 11.3) | NA               | 0.7 (0.2, 2.6)  | 0.7 (0.2, 2.2)  | 0.6 (0.2, 1.6) | 0.4 (0.1, 1.4) | 0.4 (0.2, 1)*  | 0.4 (0.2, 0.8)* | 0.4 (0.1, 1.1) | 0.3 (0.1, 1.2) | 0.3 (0.1, 0.9)* |
| Riparian (1-7y) | 0.04   | 2 (0.2, 20.4)   | 1.4 (0.4, 5.2)   | NA              | 1.0 (0.2, 4.7)  | 0.8 (0.2, 3.6) | 0.6 (0.1, 2.9) | 0.6 (0.1, 2.2) | 0.5 (0.1, 1.9)  | 0.5 (0.1, 2.3) | 0.4 (0.1, 2.3) | 0.4 (0.1, 1.9)  |
| Eucalypt (>35y) | 0.04   | 2.1 (0.2, 19.4) | 1.4 (0.4, 4.6)   | 1.0 (0.2, 4.8)  | NA              | 0.8 (0.2, 3.4) | 0.6 (0.1, 2.7) | 0.6 (0.2, 2.1) | 0.5 (0.2, 1.8)  | 0.5 (0.1, 2.1) | 0.4 (0.1, 2.2) | 0.4 (0.1, 1.8)  |
| Road            | 0.07   | 2.4 (0.3, 21.8) | 1.7 (0.6, 4.7)   | 1.2 (0.3, 5.2)  | 1.2 (0.3, 4.8)  | NA             | 0.8 (0.2, 2.7) | 0.7 (0.3, 1.9) | 0.6 (0.2, 1.6)  | 0.6 (0.2, 2)   | 0.5 (0.1, 2.2) | 0.5 (0.1, 1.8)  |
| Farmland        | 0.05   | 3.2 (0.3, 30.4) | 2.2 (0.7, 7)     | 1.6 (0.4, 7.2)  | 1.6 (0.4, 6.7)  | 1.3 (0.4, 4.7) | NA             | 0.9 (0.3, 2.7) | 0.8 (0.3, 2.3)  | 0.8 (0.2, 2.7) | 0.6 (0.1, 2.9) | 0.6 (0.2, 2.5)  |
| Heath (<1y)     | 0.13   | 3.5 (0.4, 29.8) | 2.5 (1, 5.9)*    | 1.7 (0.4, 6.8)  | 1.7 (0.5, 6.2)  | 1.4 (0.5, 4)   | 1.1 (0.4, 3.3) | NA             | 0.9 (0.4, 1.8)  | 0.9 (0.3, 2.2) | 0.7 (0.2, 2.8) | 0.7 (0.2, 2.3)  |
| Heath (1-7y)    | 0.26   | 3.9 (0.5, 31.8) | 2.7 (1.3, 5.9)*  | 1.9 (0.5, 7.2)  | 1.9 (0.6, 6.5)  | 1.6 (0.6, 4.1) | 1.2 (0.4, 3.5) | 1.1 (0.5, 2.3) | NA              | 1.0 (0.4, 2.5) | 0.8 (0.2, 2.9) | 0.8 (0.2, 2.4)  |
| Heath (7-35y)   | 0.07   | 4 (0.4, 36.6)   | 2.8 (0.9, 8.2)   | 2 (0.4, 8.8)    | 1.9 (0.5, 8)    | 1.6 (0.5, 5.3) | 1.2 (0.4, 4.1) | 1.1 (0.4, 2.9) | 1.0 (0.4, 2.6)  | NA             | 0.8 (0.2, 3.4) | 0.8 (0.2, 2.9)  |
| Edge (open)     | 0.02   | 5 (0.5, 54.3)   | 3.5 (0.9, 14.1)  | 2.5 (0.4, 13.6) | 2.4 (0.5, 12.9) | 2 (0.5, 9.1)   | 1.5 (0.3, 6.9) | 1.4 (0.4, 5.4) | 1.3 (0.3, 4.7)  | 1.2 (0.3, 5.3) | NA             | 1.0 (0.2, 4.6)  |
| Edge (forest)   | 0.03   | 5.2 (0.5, 51.4) | 3.6 (1.1, 12.1)* | 2.6 (0.5, 12.8) | 2.5 (0.6, 11.5) | 2.1 (0.6, 8.1) | 1.6 (0.4, 6.4) | 1.5 (0.4, 4.9) | 1.3 (0.4, 4.2)  | 1.3 (0.3, 4.9) | 1.0 (0.2, 5)   | NA              |

*night* (n<sub>observed</sub> = 320)

| variable        | avail. | Eucalypt (>35y)   | Riparian (1-7y)   | Riparian (>35y)   | Heath (>35y)     | Eucalypt (1-7y) | Road            | Heath (<1y)     | Heath (7-35y)   | Farmland        | Edge (forest)   | Heath (1-7y)    | Edge (open)     | Farm-stream     |
|-----------------|--------|-------------------|-------------------|-------------------|------------------|-----------------|-----------------|-----------------|-----------------|-----------------|-----------------|-----------------|-----------------|-----------------|
| Eucalypt (>35y) | 0.06   | NA                | 0.9 (0.2, 5.1)    | 0.6 (0.1, 2.6)    | 0.4 (0.1, 1.6)   | 0.2 (0.1, 0.7)* | 0.2 (0.1, 0.7)* | 0.2 (0.1, 0.6)* | 0.2 (0, 0.6)*   | 0.1 (0, 0.4)*   | 0.1 (0, 0.4)*   | 0.1 (0, 0.3)*   | 0.1 (0, 0.2)*   | 0 (0, 0.1)*     |
| Riparian (1-7y) | 0.03   | 1.1 (0.2, 6.1)    | NA                | 0.6 (0.1, 3.8)    | 0.4 (0.1, 2.4)   | 0.3 (0.1, 1.1)  | 0.2 (0, 1)      | 0.2 (0, 0.9)*   | 0.2 (0, 0.9)*   | 0.2 (0, 0.7)*   | 0.1 (0, 0.6)*   | 0.1 (0, 0.4)*   | 0.1 (0, 0.3)*   | 0 (0, 0.2)*     |
| Riparian (>35y) | 0.03   | 1.8 (0.4, 8.1)    | 1.6 (0.3, 9.9)    | NA                | 0.6 (0.1, 3.2)   | 0.4 (0.1, 1.4)  | 0.4 (0.1, 1.3)  | 0.3 (0.1, 1.2)  | 0.3 (0.1, 1.2)  | 0.3 (0.1, 0.9)* | 0.2 (0.1, 0.8)* | 0.2 (0, 0.5)*   | 0.1 (0, 0.4)*   | 0.1 (0, 0.3)*   |
| Heath (>35y)    | 0.02   | 2.8 (0.6, 12.4)   | 2.6 (0.4, 15.7)   | 1.6 (0.3, 8.1)    | NA               | 0.7 (0.2, 2.2)  | 0.6 (0.2, 2)    | 0.5 (0.2, 1.9)  | 0.5 (0.1, 1.9)  | 0.4 (0.1, 1.3)  | 0.4 (0.1, 1.2)  | 0.3 (0.1, 0.8)* | 0.2 (0.1, 0.6)* | 0.1 (0, 0.4)*   |
| Eucalypt (1-7y) | 0.19   | 4.1 (1.4, 11.7)*  | 3.8 (0.9, 15.8)   | 2.3 (0.7, 7.7)    | 1.5 (0.4, 4.8)   | NA              | 0.8 (0.4, 1.6)  | 0.8 (0.4, 1.5)  | 0.7 (0.3, 1.6)  | 0.6 (0.4, 1)*   | 0.5 (0.3, 0.9)* | 0.4 (0.2, 0.6)* | 0.3 (0.2, 0.4)* | 0.2 (0.1, 0.3)* |
| Road            | 0.06   | 4.8 (1.5, 15.3)*  | 4.4 (1, 20)       | 2.7 (0.8, 10)     | 1.7 (0.5, 6.1)   | 1.2 (0.6, 2.2)  | NA              | 0.9 (0.5, 1.9)  | 0.8 (0.3, 2)    | 0.7 (0.4, 1.3)  | 0.6 (0.3, 1.2)  | 0.4 (0.2, 0.8)* | 0.3 (0.2, 0.6)* | 0.2 (0.1, 0.4)* |
| Heath (<1y)     | 0.08   | 5.1 (1.6, 15.9)*  | 4.7 (1.1, 20.8)*  | 2.9 (0.8, 10.4)   | 1.8 (0.5, 6.3)   | 1.2 (0.7, 2.3)  | 1.1 (0.5, 2.2)  | NA              | 0.9 (0.4, 2)    | 0.7 (0.4, 1.4)  | 0.7 (0.4, 1.3)  | 0.5 (0.3, 0.8)* | 0.3 (0.2, 0.6)* | 0.2 (0.1, 0.4)* |
| Heath (7-35y)   | 0.03   | 5.8 (1.7, 20.5)*  | 5.4 (1.1, 26.1)*  | 3.3 (0.8, 13.2)   | 2.1 (0.5, 8)     | 1.4 (0.6, 3.2)  | 1.2 (0.5, 2.9)  | 1.1 (0.5, 2.6)  | NA              | 0.8 (0.4, 1.9)  | 0.8 (0.3, 1.7)  | 0.5 (0.2, 1.2)  | 0.4 (0.2, 0.8)* | 0.3 (0.1, 0.6)* |
| Farmland        | 0.12   | 7 (2.4, 20.5)*    | 6.4 (1.5, 27.5)*  | 4 (1.2, 13.5)*    | 2.5 (0.8, 8.2)   | 1.7 (1, 2.8)*   | 1.5 (0.8, 2.8)  | 1.4 (0.7, 2.6)  | 1.2 (0.5, 2.7)  | NA              | 0.9 (0.6, 1.5)  | 0.6 (0.4, 1.1)  | 0.4 (0.3, 0.7)* | 0.3 (0.2, 0.5)* |
| Edge (forest)   | 0.09   | 7.7 (2.6, 22.6)*  | 7.1 (1.6, 30.3)*  | 4.4 (1.3, 14.9)*  | 2.7 (0.8, 9)     | 1.9 (1.1, 3.2)* | 1.6 (0.8, 3.1)  | 1.5 (0.8, 2.9)  | 1.3 (0.6, 3)    | 1.1 (0.7, 1.8)  | NA              | 0.7 (0.4, 1.2)  | 0.5 (0.3, 0.7)* | 0.3 (0.2, 0.6)* |
| Heath (1-7y)    | 0.14   | 11 (3.8, 31.8)*   | 10.1 (2.4, 42.4)* | 6.2 (1.8, 21)*    | 3.9 (1.2, 12.8)* | 2.7 (1.7, 4.2)* | 2.3 (1.2, 4.2)* | 2.1 (1.2, 3.8)* | 1.9 (0.9, 4.1)  | 1.6 (1, 2.6)    | 1.4 (0.9, 2.4)  | NA              | 0.7 (0.4, 1.1)  | 0.5 (0.3, 0.8)* |
| Edge (open)     | 0.09   | 16.3 (5.7, 46.7)* | 14.9 (3.6, 62.9)* | 9.2 (2.8, 30.8)*  | 5.8 (1.8, 18.7)* | 4 (2.5, 6.3)*   | 3.4 (1.8, 6.3)* | 3.2 (1.8, 5.8)* | 2.8 (1.3, 6.2)* | 2.3 (1.5, 3.6)* | 2.1 (1.3, 3.3)* | 1.5 (0.9, 2.3)  | NA              | 0.7 (0.5, 1.2)  |
| Farm-stream     | 0.04   | 22.3 (7.5, 66.4)* | 20.4 (4.7, 88.3)* | 12.6 (3.6, 43.7)* | 7.9 (2.4, 26.4)* | 5.4 (3.1, 9.3)* | 4.6 (2.3, 9.2)* | 4.4 (2.3, 8.4)* | 3.8 (1.7, 8.8)* | 3.2 (1.9, 5.3)* | 2.9 (1.7, 5)*   | 2 (1.2, 3.5)*   | 1.4 (0.8, 2.2)  | NA              |

**Fox 6410***day (pre-fire)* (n<sub>observed</sub> = 228)

| variable               | avail. | Eucalypt<br>(7-35y) | Eucalypt<br>(will be <1y) | Road           | Plantation     | Eucalypt<br>(>35y) | Heath<br>(will be <1y) |
|------------------------|--------|---------------------|---------------------------|----------------|----------------|--------------------|------------------------|
| Eucalypt (7-35y)       | 0.22   | NA                  | 1.0 (0.6, 1.6)            | 0.7 (0.4, 1.1) | 0.6 (0.3, 1.6) | 0.6 (0.3, 1)       | 0.5 (0.3, 0.8)*        |
| Eucalypt (will be <1y) | 0.34   | 1.0 (0.6, 1.6)      | NA                        | 0.7 (0.4, 1.1) | 0.6 (0.3, 1.5) | 0.6 (0.3, 1)*      | 0.5 (0.3, 0.8)*        |
| Road                   | 0.13   | 1.5 (0.9, 2.4)      | 1.4 (0.9, 2.3)            | NA             | 0.9 (0.4, 2.2) | 0.8 (0.5, 1.5)     | 0.7 (0.4, 1.2)         |
| Plantation             | 0.03   | 1.6 (0.6, 3.9)      | 1.6 (0.7, 3.6)            | 1.1 (0.5, 2.6) | NA             | 0.9 (0.4, 2.2)     | 0.8 (0.3, 1.8)         |
| Eucalypt (>35y)        | 0.07   | 1.7 (1, 3.1)        | 1.7 (1, 2.9)*             | 1.2 (0.7, 2.1) | 1.1 (0.4, 2.7) | NA                 | 0.8 (0.5, 1.5)         |
| Heath (will be <1y)    | 0.20   | 2.1 (1.2, 3.6)*     | 2 (1.3, 3.3)*             | 1.4 (0.9, 2.4) | 1.3 (0.6, 3.1) | 1.2 (0.7, 2.1)     | NA                     |

*day (post-fire)* (n<sub>observed</sub> = 12) – analysis was not conducted due to small sample size

**Fox 6410 [cont]**

*night (pre-fire)* (n<sub>observed</sub> = 432)

| variable               | avail. | Eucalypt (>35y)  | Eucalypt (7-35y) | Plantation      | Eucalypt (will be <1y) | Heath (will be <1y) | Edge (forest)   | Farmland        | Road            |
|------------------------|--------|------------------|------------------|-----------------|------------------------|---------------------|-----------------|-----------------|-----------------|
| Eucalypt (>35y)        | 0.09   | NA               | 0.8 (0.4, 1.7)   | 0.6 (0.3, 1.2)  | 0.4 (0.2, 0.7)*        | 0.3 (0.1, 0.6)*     | 0.2 (0.1, 0.5)* | 0.2 (0.1, 0.4)* | 0.2 (0.1, 0.3)* |
| Eucalypt (7-35y)       | 0.09   | 1.3 (0.6, 2.7)   | NA               | 0.7 (0.3, 1.4)  | 0.5 (0.3, 0.8)*        | 0.4 (0.2, 0.8)*     | 0.3 (0.1, 0.7)* | 0.2 (0.1, 0.5)* | 0.2 (0.1, 0.4)* |
| Plantation             | 0.07   | 1.8 (0.9, 3.8)   | 1.4 (0.7, 3)     | NA              | 0.6 (0.4, 1.1)         | 0.6 (0.3, 1.1)      | 0.4 (0.2, 0.9)* | 0.4 (0.2, 0.7)* | 0.3 (0.2, 0.5)* |
| Eucalypt (will be <1y) | 0.31   | 2.8 (1.5, 5.1)*  | 2.2 (1.3, 3.8)*  | 1.5 (0.9, 2.7)  | NA                     | 0.9 (0.5, 1.4)      | 0.6 (0.3, 1.3)  | 0.5 (0.3, 1)    | 0.5 (0.3, 0.6)* |
| Heath (will be <1y)    | 0.07   | 3.3 (1.6, 6.8)*  | 2.6 (1.3, 5.1)*  | 1.8 (0.9, 3.5)  | 1.2 (0.7, 1.9)         | NA                  | 0.7 (0.3, 1.7)  | 0.6 (0.3, 1.4)  | 0.5 (0.3, 0.9)* |
| Edge (forest)          | 0.03   | 4.5 (1.9, 10.3)* | 3.5 (1.5, 8.4)*  | 2.5 (1.1, 5.5)* | 1.6 (0.8, 3.3)         | 1.4 (0.6, 3.1)      | NA              | 0.9 (0.5, 1.6)  | 0.7 (0.4, 1.5)  |
| Farmland               | 0.27   | 5.2 (2.5, 10.8)* | 4.1 (1.9, 9)*    | 2.9 (1.4, 5.9)* | 1.9 (1, 3.5)           | 1.6 (0.7, 3.4)      | 1.2 (0.6, 2.2)  | NA              | 0.8 (0.4, 1.6)  |
| Road                   | 0.09   | 6.1 (3.3, 11.3)* | 4.8 (2.8, 8.4)*  | 3.4 (1.9, 5.9)* | 2.2 (1.6, 3)*          | 1.9 (1.1, 3.1)*     | 1.4 (0.7, 2.8)  | 1.2 (0.6, 2.2)  | NA              |

*night (post-fire)* (n<sub>observed</sub> = 32)

| variable                  | avail. | Eucalypt (7-35y) | Eucalypt (>35y) | Eucalypt (<1y) | Heath (<1y)    | Road           |
|---------------------------|--------|------------------|-----------------|----------------|----------------|----------------|
| Plantation <sup>a</sup>   | 0.03   |                  |                 |                |                |                |
| Heath (>35y) <sup>a</sup> | 0.03   |                  |                 |                |                |                |
| Eucalypt (7-35y)          | 0.15   | NA               | 0.4 (0, 4.6)    | 0.3 (0.1, 1.6) | 0.2 (0, 1.2)   | 0.2 (0, 1.2)   |
| Eucalypt (>35y)           | 0.04   | 2.8 (0.2, 35.5)  | NA              | 0.8 (0.1, 6.6) | 0.5 (0.1, 4.7) | 0.5 (0.1, 4.8) |
| Eucalypt (<1y)            | 0.42   | 3.5 (0.6, 19.5)  | 1.3 (0.2, 10.9) | NA             | 0.7 (0.2, 2.1) | 0.7 (0.2, 2.2) |
| Heath (<1y)               | 0.28   | 5.1 (0.8, 31.9)  | 1.9 (0.2, 16.3) | 1.4 (0.5, 4.3) | NA             | 1.0 (0.3, 3.2) |
| Road                      | 0.11   | 5.2 (0.8, 31.9)  | 1.9 (0.2, 16.8) | 1.5 (0.5, 4.6) | 1.0 (0.3, 3.3) | NA             |

<sup>a</sup> These habitat types were available but never used post-fire and therefore had to be dropped from the analysis

## Fox RUSH

*day* (n<sub>observed</sub> = 131)

| variable                     | avail. | Road             | Eucalypt (>35y)  | Eucalypt (1-7y)  | Riparian (1-7y) | Heath (<1y)     | Heath (1-7y)    | Heath (7-35y)   | Edge (forest)   | Farm-stream     | Farmland        | Edge (open)     |
|------------------------------|--------|------------------|------------------|------------------|-----------------|-----------------|-----------------|-----------------|-----------------|-----------------|-----------------|-----------------|
| Riparian (>35y) <sup>a</sup> | 0.02   |                  |                  |                  |                 |                 |                 |                 |                 |                 |                 |                 |
| Heath (>35y) <sup>a</sup>    | 0.03   |                  |                  |                  |                 |                 |                 |                 |                 |                 |                 |                 |
| Road                         | 0.06   | NA               | 1.0 (0.2, 5.2)   | 0.9 (0.2, 3.5)   | 0.6 (0.1, 3.4)  | 0.5 (0.1, 1.9)  | 0.3 (0.1, 1)    | 0.3 (0.1, 1)    | 0.2 (0.1, 0.9)* | 0.2 (0.1, 0.9)* | 0.2 (0.1, 0.7)* | 0.2 (0.1, 0.7)* |
| Eucalypt (>35y)              | 0.05   | 1.0 (0.2, 5.7)   | NA               | 1.0 (0.2, 4)     | 0.7 (0.1, 3.7)  | 0.5 (0.1, 2.2)  | 0.3 (0.1, 1.2)  | 0.3 (0.1, 1.2)  | 0.3 (0.1, 1)*   | 0.2 (0.1, 1)*   | 0.2 (0.1, 0.8)* | 0.2 (0.1, 0.8)* |
| Eucalypt (1-7y)              | 0.18   | 1.1 (0.3, 4)     | 1.0 (0.3, 4.1)   | NA               | 0.7 (0.2, 2.6)  | 0.5 (0.2, 1.4)  | 0.3 (0.1, 0.7)* | 0.3 (0.1, 0.8)* | 0.3 (0.1, 0.6)* | 0.2 (0.1, 0.7)* | 0.2 (0.1, 0.5)* | 0.2 (0.1, 0.5)* |
| Riparian (1-7y)              | 0.04   | 1.5 (0.3, 8.2)   | 1.5 (0.3, 8.1)   | 1.5 (0.4, 5.4)   | NA              | 0.8 (0.2, 3)    | 0.5 (0.1, 1.7)  | 0.4 (0.1, 1.7)  | 0.4 (0.1, 1.4)  | 0.3 (0.1, 1.4)  | 0.3 (0.1, 1.1)  | 0.3 (0.1, 1.1)  |
| Heath (<1y)                  | 0.11   | 2 (0.5, 7.5)     | 1.9 (0.5, 7.9)   | 1.9 (0.7, 4.9)   | 1.3 (0.3, 5.1)  | NA              | 0.6 (0.3, 1.3)  | 0.5 (0.2, 1.4)  | 0.5 (0.2, 1.2)  | 0.5 (0.2, 1.2)  | 0.4 (0.2, 0.9)* | 0.4 (0.2, 0.9)* |
| Heath (1-7y)                 | 0.15   | 3.3 (1, 11.5)    | 3.2 (0.8, 12.3)  | 3.1 (1.4, 7)*    | 2.2 (0.6, 7.8)  | 1.7 (0.7, 3.7)  | NA              | 0.9 (0.4, 2.2)  | 0.8 (0.4, 1.8)  | 0.8 (0.3, 1.9)  | 0.7 (0.3, 1.3)  | 0.7 (0.3, 1.4)  |
| Heath (7-35y)                | 0.06   | 3.8 (1, 14.6)    | 3.6 (0.8, 15.3)  | 3.5 (1.3, 9.6)*  | 2.4 (0.6, 9.8)  | 1.9 (0.7, 4.7)  | 1.1 (0.5, 2.7)  | NA              | 0.9 (0.4, 2.3)  | 0.8 (0.3, 2.4)  | 0.7 (0.3, 1.7)  | 0.7 (0.3, 1.8)  |
| Edge (forest)                | 0.09   | 4 (1.1, 14.5)*   | 3.8 (1, 14.5)*   | 3.8 (1.6, 8.7)*  | 2.6 (0.7, 9.4)  | 2 (0.9, 4.8)    | 1.2 (0.6, 2.6)  | 1.1 (0.4, 2.7)  | NA              | 0.9 (0.4, 2.3)  | 0.8 (0.4, 1.6)  | 0.8 (0.4, 1.6)  |
| Farm-stream                  | 0.05   | 4.4 (1.1, 17.7)* | 4.2 (1, 17.9)*   | 4.2 (1.5, 11.6)* | 2.9 (0.7, 11.8) | 2.2 (0.8, 6.1)  | 1.3 (0.5, 3.4)  | 1.2 (0.4, 3.3)  | 1.1 (0.4, 2.8)  | NA              | 0.9 (0.4, 2)    | 0.9 (0.3, 2.1)  |
| Farmland                     | 0.13   | 5.1 (1.5, 17.5)* | 4.8 (1.3, 17.7)* | 4.7 (2.2, 10.4)* | 3.3 (0.9, 11.5) | 2.5 (1.1, 5.6)* | 1.5 (0.8, 3)    | 1.3 (0.6, 3.1)  | 1.3 (0.6, 2.5)  | 1.1 (0.5, 2.6)  | NA              | 1.0 (0.5, 1.9)  |
| Edge (open)                  | 0.08   | 5.1 (1.4, 18.5)* | 4.9 (1.3, 18.7)* | 4.8 (2.1, 11.1)* | 3.3 (0.9, 12)   | 2.6 (1.1, 6.1)* | 1.5 (0.7, 3.3)  | 1.4 (0.6, 3.4)  | 1.3 (0.6, 2.7)  | 1.2 (0.5, 2.9)  | 1.0 (0.5, 1.9)  | NA              |

<sup>a</sup> These habitats were available but never used and therefore had to be dropped from the analysis

*night* (n<sub>observed</sub> = 290)

| variable        | avail. | Eucalypt (>35y)  | Riparian (>35y)  | Heath (7-35y)   | Heath (<1y)     | Road            | Eucalypt (1-7y) | Farmland        | Edge (forest)   | Heath (1-7y)    | Farm-stream     | Edge (open)     |
|-----------------|--------|------------------|------------------|-----------------|-----------------|-----------------|-----------------|-----------------|-----------------|-----------------|-----------------|-----------------|
| Eucalypt (>35y) | 0.12   | NA               | 1.0 (0.3, 2.8)   | 0.5 (0.2, 1)    | 0.4 (0.2, 0.9)* | 0.4 (0.2, 0.7)* | 0.3 (0.2, 0.7)* | 0.3 (0.1, 0.5)* | 0.3 (0.1, 0.5)* | 0.2 (0.1, 0.5)* | 0.2 (0.1, 0.5)* | 0.2 (0.1, 0.3)* |
| Riparian (>35y) | 0.04   | 1.0 (0.4, 3)     | NA               | 0.5 (0.2, 1.4)  | 0.4 (0.1, 1.2)  | 0.4 (0.1, 1.1)  | 0.4 (0.1, 1)*   | 0.3 (0.1, 0.7)* | 0.3 (0.1, 0.7)* | 0.2 (0.1, 0.7)* | 0.2 (0.1, 0.7)* | 0.2 (0.1, 0.4)* |
| Heath (7-35y)   | 0.07   | 2.2 (1, 4.9)     | 2.1 (0.7, 6.2)   | NA              | 0.9 (0.4, 1.9)  | 0.8 (0.4, 1.7)  | 0.7 (0.4, 1.5)  | 0.6 (0.3, 1.1)  | 0.6 (0.3, 1.1)  | 0.5 (0.2, 1.1)  | 0.5 (0.2, 1)    | 0.3 (0.2, 0.7)* |
| Heath (<1y)     | 0.08   | 2.5 (1.1, 5.5)*  | 2.4 (0.8, 6.9)   | 1.1 (0.5, 2.4)  | NA              | 0.9 (0.4, 1.9)  | 0.8 (0.4, 1.7)  | 0.6 (0.4, 1.1)  | 0.6 (0.3, 1.2)  | 0.6 (0.3, 1.1)  | 0.6 (0.3, 1.1)  | 0.4 (0.2, 0.7)* |
| Road            | 0.07   | 2.7 (1.3, 5.4)*  | 2.6 (0.9, 7.2)   | 1.2 (0.6, 2.6)  | 1.1 (0.5, 2.2)  | NA              | 0.9 (0.5, 1.8)  | 0.7 (0.4, 1.2)  | 0.7 (0.4, 1.3)  | 0.6 (0.3, 1.2)  | 0.6 (0.3, 1.2)  | 0.4 (0.2, 0.8)* |
| Eucalypt (1-7y) | 0.1    | 2.9 (1.4, 6)*    | 2.8 (1, 7.6)*    | 1.3 (0.7, 2.8)  | 1.2 (0.6, 2.3)  | 1.1 (0.6, 2.1)  | NA              | 0.8 (0.4, 1.3)  | 0.7 (0.4, 1.3)  | 0.7 (0.4, 1.2)  | 0.7 (0.4, 1.2)  | 0.5 (0.3, 0.8)* |
| Farmland        | 0.2    | 3.9 (2.1, 7.3)*  | 3.7 (1.4, 9.8)*  | 1.8 (0.9, 3.4)  | 1.6 (0.9, 2.8)  | 1.4 (0.8, 2.6)  | 1.3 (0.8, 2.2)  | NA              | 1.0 (0.6, 1.6)  | 0.9 (0.5, 1.6)  | 0.9 (0.6, 1.4)  | 0.6 (0.4, 0.9)* |
| Edge (forest)   | 0.08   | 3.9 (2, 7.8)*    | 3.7 (1.4, 10.2)* | 1.8 (0.9, 3.6)  | 1.6 (0.8, 3)    | 1.5 (0.8, 2.7)  | 1.3 (0.8, 2.4)  | 1.0 (0.6, 1.6)  | NA              | 0.9 (0.5, 1.7)  | 0.9 (0.5, 1.6)  | 0.6 (0.4, 1)    |
| Heath (1-7y)    | 0.07   | 4.3 (2, 9.3)*    | 4.2 (1.5, 11.7)* | 2 (0.9, 4.2)    | 1.8 (0.9, 3.5)  | 1.6 (0.8, 3.2)  | 1.5 (0.8, 2.7)  | 1.1 (0.6, 2)    | 1.1 (0.6, 2.1)  | NA              | 1.0 (0.5, 1.9)  | 0.7 (0.4, 1.2)  |
| Farm-stream     | 0.08   | 4.3 (2.2, 8.6)*  | 4.2 (1.5, 11.4)* | 2 (1, 4)        | 1.8 (0.9, 3.4)  | 1.6 (0.9, 3)    | 1.5 (0.8, 2.7)  | 1.1 (0.7, 1.8)  | 1.1 (0.6, 1.9)  | 1.0 (0.5, 1.9)  | NA              | 0.7 (0.4, 1.1)  |
| Edge (open)     | 0.09   | 6.4 (3.3, 12.5)* | 6.1 (2.3, 16.4)* | 2.9 (1.5, 5.7)* | 2.6 (1.4, 4.7)* | 2.4 (1.3, 4.3)* | 2.2 (1.3, 3.7)* | 1.7 (1.1, 2.5)* | 1.6 (1, 2.7)    | 1.5 (0.8, 2.6)  | 1.5 (0.9, 2.4)  | NA              |

## Fox RUST

### *day* (nobserved = 84)

| variable                    | avail. | Eucalypt (>35y) | Road             | Riparian (<1y)   | Farm-stream     | Heath (<1y)     | Heath (>35y)   | Farmland       | Edge (open)    | Heath (7-35y)  | Riparian (>35y) | Edge (forest)   |
|-----------------------------|--------|-----------------|------------------|------------------|-----------------|-----------------|----------------|----------------|----------------|----------------|-----------------|-----------------|
| Eucalypt (<1y) <sup>a</sup> | 0.06   |                 |                  |                  |                 |                 |                |                |                |                |                 |                 |
| Eucalypt (>35y)             | 0.04   | NA              | 0.9 (0.1, 10.3)  | 0.7 (0.1, 8.5)   | 0.7 (0, 11.6)   | 0.5 (0.1, 4)    | 0.2 (0, 2.2)   | 0.2 (0, 1.7)   | 0.2 (0, 1.6)   | 0.2 (0, 1.9)   | 0.2 (0, 1.3)    | 0.1 (0, 1.1)    |
| Road                        | 0.07   | 1.1 (0.1, 12.9) | NA               | 0.8 (0.1, 6.1)   | 0.8 (0.1, 8.9)  | 0.6 (0.1, 2.6)  | 0.3 (0.1, 1.5) | 0.2 (0.1, 1.1) | 0.2 (0, 1.1)   | 0.2 (0, 1.3)   | 0.2 (0, 0.8)*   | 0.2 (0, 0.7)*   |
| Riparian (<1y)              | 0.05   | 1.4 (0.1, 15.9) | 1.2 (0.2, 9.1)   | NA               | 1.0 (0.1, 11.2) | 0.7 (0.1, 3.1)  | 0.3 (0.1, 1.8) | 0.3 (0.1, 1.4) | 0.3 (0.1, 1.4) | 0.3 (0, 1.7)   | 0.2 (0, 1.1)    | 0.2 (0, 0.9)*   |
| Farm-stream                 | 0.03   | 1.4 (0.1, 23.7) | 1.3 (0.1, 14.6)  | 1.0 (0.1, 12.2)  | NA              | 0.7 (0.1, 5.8)  | 0.3 (0, 3)     | 0.3 (0, 2.4)   | 0.3 (0, 2.3)   | 0.3 (0, 2.7)   | 0.2 (0, 1.9)    | 0.2 (0, 1.5)    |
| Heath (<1y)                 | 0.21   | 2 (0.2, 16.3)   | 1.8 (0.4, 8.2)   | 1.5 (0.3, 6.8)   | 1.4 (0.2, 11.5) | NA              | 0.5 (0.2, 1.5) | 0.4 (0.2, 1)   | 0.4 (0.2, 1)   | 0.4 (0.1, 1.5) | 0.3 (0.1, 0.8)* | 0.3 (0.1, 0.7)* |
| Heath (>35y)                | 0.07   | 4.1 (0.5, 36.2) | 3.7 (0.7, 19.4)  | 3 (0.5, 16.4)    | 2.9 (0.3, 24.6) | 2 (0.7, 6.3)    | NA             | 0.9 (0.3, 2.4) | 0.8 (0.3, 2.4) | 0.8 (0.2, 3.4) | 0.6 (0.2, 2)    | 0.6 (0.2, 1.5)  |
| Farmland                    | 0.18   | 4.6 (0.6, 35.9) | 4.1 (0.9, 18.5)  | 3.4 (0.7, 15.6)  | 3.2 (0.4, 24.8) | 2.3 (1, 5.4)    | 1.1 (0.4, 3.1) | NA             | 0.9 (0.4, 2)   | 0.9 (0.2, 3.1) | 0.7 (0.3, 1.7)  | 0.6 (0.3, 1.3)  |
| Edge (open)                 | 0.11   | 4.9 (0.6, 39.3) | 4.4 (0.9, 20.6)  | 3.6 (0.7, 17.4)  | 3.4 (0.4, 27.3) | 2.4 (1, 6.1)    | 1.2 (0.4, 3.5) | 1.1 (0.5, 2.3) | NA             | 0.9 (0.2, 3.5) | 0.8 (0.3, 1.9)  | 0.7 (0.3, 1.5)  |
| Heath (7-35y)               | 0.03   | 5.4 (0.5, 55.1) | 4.8 (0.8, 30)    | 3.9 (0.6, 25.6)  | 3.8 (0.4, 37.9) | 2.7 (0.7, 10.4) | 1.3 (0.3, 5.8) | 1.2 (0.3, 4.2) | 1.1 (0.3, 4.2) | NA             | 0.9 (0.2, 3.4)  | 0.8 (0.2, 2.7)  |
| Riparian (>35y)             | 0.08   | 6.3 (0.8, 50.3) | 5.6 (1.2, 26.9)* | 4.6 (0.9, 22.6)  | 4.4 (0.5, 35.9) | 3.1 (1.2, 8.1)* | 1.5 (0.5, 4.7) | 1.4 (0.6, 3.1) | 1.3 (0.5, 3.1) | 1.2 (0.3, 4.6) | NA              | 0.9 (0.4, 2)    |
| Edge (forest)               | 0.13   | 7.1 (0.9, 55.5) | 6.4 (1.4, 28.5)* | 5.2 (1.1, 24.2)* | 5 (0.7, 38.4)   | 3.6 (1.5, 8.2)* | 1.7 (0.6, 4.7) | 1.6 (0.8, 3.1) | 1.5 (0.7, 3.2) | 1.3 (0.4, 4.8) | 1.1 (0.5, 2.5)  | NA              |

<sup>a</sup> This habitat was available but never used and therefore had to be dropped from the analysis

### *night* (nobserved = 411)

| variable        | avail. | Heath (>35y)      | Eucalypt (>35y)  | Heath (<1y)     | Eucalypt (<1y)  | Road            | Riparian (>35y) | Farmland        | Edge (forest)   | Riparian (<1y)  | Farm-stream     | Edge (open)     | Heath (7-35y)   |
|-----------------|--------|-------------------|------------------|-----------------|-----------------|-----------------|-----------------|-----------------|-----------------|-----------------|-----------------|-----------------|-----------------|
| Heath (>35y)    | 0.09   | NA                | 0.4 (0.1, 1.3)   | 0.3 (0.1, 0.8)* | 0.3 (0.1, 0.8)* | 0.2 (0.1, 0.5)* | 0.2 (0.1, 0.4)* | 0.2 (0.1, 0.4)* | 0.2 (0.1, 0.4)* | 0.2 (0.1, 0.4)* | 0.1 (0.1, 0.3)* | 0.1 (0.1, 0.3)* | 0.1 (0, 0.2)*   |
| Eucalypt (>35y) | 0.03   | 2.3 (0.7, 7.1)    | NA               | 0.8 (0.3, 1.9)  | 0.7 (0.2, 1.8)  | 0.5 (0.2, 1.1)  | 0.4 (0.1, 1)    | 0.4 (0.2, 0.9)* | 0.4 (0.2, 0.9)* | 0.4 (0.1, 1)*   | 0.3 (0.1, 0.8)* | 0.3 (0.1, 0.7)* | 0.2 (0.1, 0.5)* |
| Heath (<1y)     | 0.15   | 3 (1.3, 6.8)*     | 1.3 (0.5, 3.2)   | NA              | 0.9 (0.4, 1.7)  | 0.6 (0.3, 1)*   | 0.5 (0.3, 0.9)* | 0.5 (0.3, 0.7)* | 0.5 (0.3, 0.7)* | 0.5 (0.3, 0.9)* | 0.4 (0.2, 0.7)* | 0.4 (0.3, 0.6)* | 0.2 (0.1, 0.4)* |
| Eucalypt (<1y)  | 0.05   | 3.4 (1.3, 8.9)*   | 1.5 (0.5, 4)     | 1.1 (0.6, 2.2)  | NA              | 0.7 (0.3, 1.4)  | 0.6 (0.3, 1.2)  | 0.6 (0.3, 1)    | 0.5 (0.3, 1)    | 0.5 (0.2, 1.2)  | 0.5 (0.2, 0.9)* | 0.5 (0.2, 0.9)* | 0.3 (0.1, 0.5)* |
| Road            | 0.06   | 5.1 (2.2, 11.9)*  | 2.2 (0.9, 5.6)   | 1.7 (1, 2.9)*   | 1.5 (0.7, 3)    | NA              | 0.9 (0.5, 1.6)  | 0.8 (0.5, 1.3)  | 0.8 (0.5, 1.3)  | 0.8 (0.4, 1.6)  | 0.7 (0.4, 1.2)  | 0.7 (0.4, 1.1)  | 0.4 (0.2, 0.7)* |
| Riparian (>35y) | 0.04   | 5.9 (2.4, 14.6)*  | 2.6 (1, 6.7)     | 2 (1.1, 3.6)*   | 1.7 (0.8, 3.6)  | 1.2 (0.6, 2.2)  | NA              | 1.0 (0.6, 1.6)  | 0.9 (0.5, 1.6)  | 0.9 (0.5, 1.9)  | 0.8 (0.4, 1.5)  | 0.8 (0.5, 1.4)  | 0.5 (0.2, 0.9)* |
| Farmland        | 0.24   | 6.2 (2.9, 13.5)*  | 2.7 (1.1, 6.4)*  | 2.1 (1.4, 3.1)* | 1.8 (1, 3.4)    | 1.2 (0.8, 1.9)  | 1.0 (0.6, 1.8)  | NA              | 1.0 (0.7, 1.4)  | 1.0 (0.5, 1.7)  | 0.8 (0.5, 1.3)  | 0.8 (0.6, 1.1)  | 0.5 (0.3, 0.8)* |
| Edge (forest)   | 0.12   | 6.3 (2.9, 14)*    | 2.8 (1.1, 6.6)*  | 2.1 (1.4, 3.3)* | 1.9 (1, 3.5)    | 1.2 (0.8, 2)    | 1.1 (0.6, 1.9)  | 1.0 (0.7, 1.4)  | NA              | 1.0 (0.5, 1.8)  | 0.9 (0.5, 1.4)  | 0.8 (0.6, 1.2)  | 0.5 (0.3, 0.8)* |
| Riparian (<1y)  | 0.03   | 6.3 (2.5, 16.1)*  | 2.8 (1, 7.5)*    | 2.1 (1.1, 4)*   | 1.9 (0.9, 4)    | 1.2 (0.6, 2.4)  | 1.1 (0.5, 2.2)  | 1.0 (0.6, 1.8)  | 1.0 (0.5, 1.8)  | NA              | 0.9 (0.4, 1.7)  | 0.9 (0.5, 1.6)  | 0.5 (0.2, 1)*   |
| Farm-stream     | 0.05   | 7.4 (3.2, 17.3)*  | 3.2 (1.3, 8.2)*  | 2.5 (1.5, 4.3)* | 2.2 (1.1, 4.4)* | 1.5 (0.8, 2.6)  | 1.3 (0.7, 2.4)  | 1.2 (0.8, 1.9)  | 1.2 (0.7, 1.9)  | 1.2 (0.6, 2.3)  | NA              | 1.0 (0.6, 1.6)  | 0.6 (0.3, 1)    |
| Edge (open)     | 0.13   | 7.4 (3.4, 16.4)*  | 3.2 (1.4, 7.8)*  | 2.5 (1.6, 3.8)* | 2.2 (1.2, 4.1)* | 1.5 (0.9, 2.4)  | 1.3 (0.7, 2.2)  | 1.2 (0.9, 1.6)  | 1.2 (0.8, 1.7)  | 1.2 (0.6, 2.1)  | 1.0 (0.6, 1.6)  | NA              | 0.6 (0.3, 1)*   |
| Heath (7-35y)   | 0.02   | 13.1 (5.4, 31.5)* | 5.7 (2.2, 14.8)* | 4.4 (2.5, 7.7)* | 3.8 (1.8, 8)*   | 2.6 (1.4, 4.7)* | 2.2 (1.1, 4.3)* | 2.1 (1.3, 3.4)* | 2.1 (1.2, 3.5)* | 2.1 (1, 4.1)*   | 1.8 (1, 3.2)    | 1.8 (1.1, 2.9)* | NA              |

**Fox 5590***day* (n<sub>observed</sub> = 104)

| variable         | avail. | Farmland           | Eucalypt (>35y) | Eucalypt (7-35y) | Road           | Edge (open)    | Edge (forest)  | Riparian (7-35y) |
|------------------|--------|--------------------|-----------------|------------------|----------------|----------------|----------------|------------------|
| Farmland         | 0.12   | NA                 | 0.1 (0, 1.7)    | 0.1 (0, 0.5)*    | 0.1 (0, 0.4)*  | 0 (0, 0.4)*    | 0 (0, 0.3)*    | 0 (0, 0.2)*      |
| Eucalypt (>35y)  | 0.04   | 6.7 (0.6, 75)      | NA              | 0.5 (0.1, 2)     | 0.4 (0.1, 1.7) | 0.3 (0.1, 1.7) | 0.3 (0.1, 1.4) | 0.2 (0, 1)*      |
| Eucalypt (7-35y) | 0.53   | 14.5 (2, 107.6)*   | 2.2 (0.5, 9.4)  | NA               | 0.8 (0.4, 1.5) | 0.7 (0.2, 2)   | 0.6 (0.2, 1.4) | 0.5 (0.3, 0.8)*  |
| Road             | 0.09   | 18.5 (2.4, 144.3)* | 2.8 (0.6, 12.9) | 1.3 (0.7, 2.5)   | NA             | 0.8 (0.3, 2.8) | 0.7 (0.3, 2)   | 0.6 (0.3, 1.3)   |
| Edge (open)      | 0.03   | 22 (2.4, 201)*     | 3.3 (0.6, 18.6) | 1.5 (0.5, 4.5)   | 1.2 (0.4, 3.9) | NA             | 0.9 (0.2, 3.2) | 0.7 (0.2, 2.2)   |
| Edge (forest)    | 0.03   | 25.5 (3, 216.8)*   | 3.8 (0.7, 19.7) | 1.8 (0.7, 4.4)   | 1.4 (0.5, 3.9) | 1.2 (0.3, 4.4) | NA             | 0.8 (0.3, 2.2)   |
| Riparian (7-35y) | 0.15   | 30.8 (4.1, 232.5)* | 4.6 (1, 20.5)*  | 2.1 (1.3, 3.5)*  | 1.7 (0.8, 3.5) | 1.4 (0.5, 4.3) | 1.2 (0.5, 3.1) | NA               |

*night* (n<sub>observed</sub> = 477)

| variable         | avail. | Riparian (7-35y) | Eucalypt (7-35y) | Eucalypt (>35y) | Farmland        | Reservoir/dam   | Edge (open)     | Edge (forest)   | Road            |
|------------------|--------|------------------|------------------|-----------------|-----------------|-----------------|-----------------|-----------------|-----------------|
| Riparian (7-35y) | 0.07   | NA               | 0.8 (0.5, 1.3)   | 0.6 (0.3, 1.2)  | 0.6 (0.3, 0.9)* | 0.5 (0.2, 0.9)* | 0.4 (0.2, 0.7)* | 0.4 (0.2, 0.6)* | 0.3 (0.2, 0.5)* |
| Eucalypt (7-35y) | 0.27   | 1.3 (0.7, 2.1)   | NA               | 0.7 (0.4, 1.3)  | 0.7 (0.5, 0.9)* | 0.6 (0.3, 0.9)* | 0.5 (0.3, 0.7)* | 0.4 (0.3, 0.7)* | 0.4 (0.3, 0.5)* |
| Eucalypt (>35y)  | 0.03   | 1.7 (0.8, 3.6)   | 1.4 (0.7, 2.5)   | NA              | 1.0 (0.5, 1.7)  | 0.8 (0.4, 1.6)  | 0.6 (0.3, 1.2)  | 0.6 (0.3, 1.2)  | 0.5 (0.3, 0.9)* |
| Farmland         | 0.43   | 1.8 (1.1, 3)*    | 1.4 (1.1, 1.9)*  | 1.0 (0.6, 1.9)  | NA              | 0.8 (0.5, 1.3)  | 0.7 (0.4, 1)*   | 0.6 (0.4, 0.9)* | 0.5 (0.4, 0.7)* |
| Reservoir/dam    | 0.04   | 2.2 (1.2, 4.2)*  | 1.8 (1.1, 2.9)*  | 1.3 (0.6, 2.6)  | 1.2 (0.8, 2)    | NA              | 0.8 (0.5, 1.4)  | 0.8 (0.5, 1.4)  | 0.6 (0.4, 1.1)  |
| Edge (open)      | 0.05   | 2.7 (1.5, 5)*    | 2.2 (1.4, 3.4)*  | 1.6 (0.8, 3.1)  | 1.5 (1, 2.3)*   | 1.2 (0.7, 2.2)  | NA              | 1.0 (0.6, 1.6)  | 0.8 (0.5, 1.3)  |
| Edge (forest)    | 0.05   | 2.8 (1.6, 5)*    | 2.2 (1.5, 3.4)*  | 1.6 (0.8, 3.1)  | 1.6 (1.1, 2.3)* | 1.3 (0.7, 2.2)  | 1.0 (0.6, 1.7)  | NA              | 0.8 (0.5, 1.3)  |
| Road             | 0.07   | 3.5 (2, 6)*      | 2.8 (2, 3.9)*    | 2 (1.1, 3.8)*   | 1.9 (1.4, 2.7)* | 1.6 (0.9, 2.6)  | 1.3 (0.8, 2)    | 1.2 (0.8, 1.9)  | NA              |

**Fox 4590***day* (n<sub>observed</sub> = 337)

| variable        | avail. | Plantation      | Road            | Farmland       | Eucalypt (>35y) | Edge (forest)   | Reservoir/dam   |
|-----------------|--------|-----------------|-----------------|----------------|-----------------|-----------------|-----------------|
| Plantation      | 0.42   | NA              | 0.9 (0.4, 1.9)  | 0.8 (0.3, 2.1) | 0.8 (0.6, 1.1)  | 0.8 (0.5, 1.3)  | 0.3 (0.2, 0.4)* |
| Road            | 0.03   | 1.1 (0.5, 2.4)  | NA              | 0.9 (0.3, 3)   | 0.9 (0.4, 1.9)  | 0.9 (0.4, 2)    | 0.3 (0.1, 0.7)* |
| Farmland        | 0.02   | 1.2 (0.5, 3)    | 1.1 (0.3, 3.3)  | NA             | 0.9 (0.4, 2.4)  | 0.9 (0.3, 2.5)  | 0.3 (0.1, 0.8)* |
| Eucalypt (>35y) | 0.40   | 1.3 (0.9, 1.7)  | 1.1 (0.5, 2.4)  | 1.1 (0.4, 2.7) | NA              | 1.0 (0.6, 1.6)  | 0.3 (0.2, 0.5)* |
| Edge (forest)   | 0.05   | 1.3 (0.8, 2.2)  | 1.2 (0.5, 2.7)  | 1.1 (0.4, 3)   | 1.0 (0.6, 1.7)  | NA              | 0.4 (0.2, 0.6)* |
| Reservoir/dam   | 0.08   | 3.6 (2.5, 5.4)* | 3.2 (1.4, 7.2)* | 3.1 (1.2, 8)*  | 2.9 (1.9, 4.3)* | 2.8 (1.5, 5.1)* | NA              |

*night* (n<sub>observed</sub> = 839)

| variable        | avail. | Plantation      | Eucalypt (>35y) | Edge (forest)   | Farmland        | Edge (open)     | Farm-stream     | Road            | Reservoir       |
|-----------------|--------|-----------------|-----------------|-----------------|-----------------|-----------------|-----------------|-----------------|-----------------|
| Plantation      | 0.38   | NA              | 1.0 (0.7, 1.3)  | 0.6 (0.4, 0.9)* | 0.5 (0.4, 0.6)* | 0.4 (0.3, 0.7)* | 0.4 (0.3, 0.5)* | 0.3 (0.3, 0.4)* | 0.2 (0.1, 0.2)* |
| Eucalypt (>35y) | 0.14   | 1.0 (0.8, 1.4)  | NA              | 0.6 (0.4, 1)*   | 0.5 (0.3, 0.6)* | 0.5 (0.3, 0.7)* | 0.4 (0.2, 0.6)* | 0.3 (0.2, 0.4)* | 0.2 (0.1, 0.3)* |
| Edge (forest)   | 0.05   | 1.6 (1.1, 2.3)* | 1.6 (1, 2.3)*   | NA              | 0.7 (0.5, 1)    | 0.7 (0.4, 1.1)  | 0.6 (0.4, 0.9)* | 0.5 (0.4, 0.7)* | 0.3 (0.2, 0.4)* |
| Farmland        | 0.22   | 2.2 (1.7, 2.8)* | 2.2 (1.6, 3)*   | 1.4 (1, 2)      | NA              | 1.0 (0.7, 1.4)  | 0.8 (0.6, 1.1)  | 0.7 (0.5, 0.9)* | 0.4 (0.3, 0.5)* |
| Edge (open)     | 0.03   | 2.2 (1.5, 3.3)* | 2.2 (1.4, 3.4)* | 1.4 (0.9, 2.3)  | 1.0 (0.7, 1.5)  | NA              | 0.8 (0.5, 1.3)  | 0.7 (0.5, 1.1)  | 0.4 (0.3, 0.6)* |
| Farm-stream     | 0.04   | 2.7 (1.9, 3.9)* | 2.7 (1.8, 4.1)* | 1.7 (1.1, 2.7)* | 1.3 (0.9, 1.8)  | 1.2 (0.8, 2)    | NA              | 0.9 (0.6, 1.3)  | 0.5 (0.3, 0.7)* |
| Road            | 0.1    | 3.1 (2.5, 4)*   | 3.1 (2.2, 4.2)* | 2 (1.4, 2.9)*   | 1.4 (1.1, 1.8)* | 1.4 (0.9, 2.1)  | 1.1 (0.8, 1.6)  | NA              | 0.6 (0.4, 0.7)* |
| Reservoir       | 0.04   | 5.7 (4.3, 7.5)* | 5.6 (4, 7.9)*   | 3.6 (2.4, 5.3)* | 2.6 (2, 3.4)*   | 2.5 (1.7, 3.9)* | 2.1 (1.4, 3.1)* | 1.8 (1.3, 2.4)* | NA              |



## Fox GAMY

*day* (n<sub>observed</sub> = 127)

| variable        | avail. | Road            | Heath (1-7y)    | Eucalypt (<1y) | Eucalypt (>35y) | Eucalypt (1-7y) | Edge (open)    | Farmland       | Edge (forest)  | Farm-stream    |
|-----------------|--------|-----------------|-----------------|----------------|-----------------|-----------------|----------------|----------------|----------------|----------------|
| Road            | 0.05   | NA              | 0.9 (0.1, 10)   | 0.4 (0.1, 3.1) | 0.4 (0.1, 1.8)  | 0.4 (0.1, 1.6)  | 0.3 (0.1, 1.3) | 0.3 (0.1, 1.1) | 0.2 (0.1, 1.1) | 0.2 (0.1, 1)   |
| Heath (1-7y)    | 0.02   | 1.1 (0.1, 12.6) | NA              | 0.5 (0, 5.5)   | 0.4 (0.1, 3.4)  | 0.4 (0.1, 3.1)  | 0.3 (0, 2.4)   | 0.3 (0, 2.3)   | 0.3 (0, 2.1)   | 0.3 (0, 2)     |
| Eucalypt (<1y)  | 0.03   | 2.3 (0.3, 15.8) | 2 (0.2, 22.6)   | NA             | 0.8 (0.2, 3.9)  | 0.8 (0.2, 3.7)  | 0.6 (0.1, 2.8) | 0.6 (0.1, 2.5) | 0.6 (0.1, 2.4) | 0.5 (0.1, 2.3) |
| Eucalypt (>35y) | 0.08   | 2.7 (0.6, 13.1) | 2.4 (0.3, 19.8) | 1.2 (0.3, 5.6) | NA              | 1.0 (0.4, 2.5)  | 0.8 (0.3, 1.9) | 0.7 (0.3, 1.6) | 0.7 (0.3, 1.6) | 0.6 (0.3, 1.5) |
| Eucalypt (1-7y) | 0.15   | 2.8 (0.6, 13.1) | 2.5 (0.3, 19.7) | 1.3 (0.3, 5.8) | 1.0 (0.4, 2.7)  | NA              | 0.8 (0.3, 1.9) | 0.8 (0.4, 1.6) | 0.7 (0.3, 1.6) | 0.7 (0.3, 1.6) |
| Edge (open)     | 0.11   | 3.6 (0.8, 16.2) | 3.2 (0.4, 25)   | 1.6 (0.4, 6.9) | 1.3 (0.5, 3.2)  | 1.3 (0.5, 3)    | NA             | 1.0 (0.5, 1.8) | 0.9 (0.4, 1.8) | 0.8 (0.4, 1.8) |
| Farmland        | 0.36   | 3.7 (0.9, 15.6) | 3.3 (0.4, 24.7) | 1.6 (0.4, 6.7) | 1.4 (0.6, 3)    | 1.3 (0.6, 2.8)  | 1.0 (0.6, 1.9) | NA             | 0.9 (0.5, 1.6) | 0.9 (0.5, 1.6) |
| Edge (forest)   | 0.1    | 4.1 (0.9, 18.3) | 3.7 (0.5, 28.4) | 1.8 (0.4, 7.8) | 1.5 (0.6, 3.6)  | 1.5 (0.6, 3.3)  | 1.1 (0.5, 2.4) | 1.1 (0.6, 2)   | NA             | 1.0 (0.5, 2)   |
| Farm-stream     | 0.11   | 4.3 (1, 19.5)   | 3.8 (0.5, 30.1) | 1.9 (0.4, 8.4) | 1.6 (0.6, 3.9)  | 1.5 (0.6, 3.7)  | 1.2 (0.6, 2.6) | 1.2 (0.6, 2.1) | 1.0 (0.5, 2.2) | NA             |

*night* (n<sub>observed</sub> = 155)

| variable        | avail. | Road             | Heath (<1y)      | Eucalypt (<1y)  | Farmland        | Eucalypt (>35y) | Edge (open)    | Eucalypt (1-7y) | Farm-stream     | Edge (forest)   |
|-----------------|--------|------------------|------------------|-----------------|-----------------|-----------------|----------------|-----------------|-----------------|-----------------|
| Road            | 0.04   | NA               | 0.8 (0.1, 11)    | 0.5 (0, 6.6)    | 0.2 (0, 1.4)    | 0.2 (0, 1.3)    | 0.2 (0, 1.1)   | 0.1 (0, 0.8)*   | 0.1 (0, 0.7)*   | 0.1 (0, 0.7)*   |
| Heath (<1y)     | 0.04   | 1.2 (0.1, 15.4)  | NA               | 0.6 (0.1, 4.2)  | 0.2 (0, 1.3)    | 0.2 (0, 1.2)    | 0.2 (0, 1)     | 0.1 (0, 0.7)*   | 0.1 (0, 0.6)*   | 0.1 (0, 0.6)*   |
| Eucalypt (<1y)  | 0.02   | 2 (0.2, 26.5)    | 1.7 (0.2, 12.2)  | NA              | 0.4 (0.1, 2.2)  | 0.3 (0.1, 2)    | 0.3 (0.1, 1.8) | 0.2 (0, 1.3)    | 0.2 (0, 1.1)    | 0.2 (0, 1)      |
| Farmland        | 0.34   | 5.2 (0.7, 38.2)  | 4.4 (0.8, 24.1)  | 2.6 (0.5, 14.4) | NA              | 0.9 (0.4, 1.8)  | 0.8 (0.4, 1.4) | 0.6 (0.3, 1.1)  | 0.5 (0.3, 0.8)* | 0.5 (0.3, 0.8)* |
| Eucalypt (>35y) | 0.07   | 6 (0.8, 47.8)    | 5.1 (0.9, 30.3)  | 3 (0.5, 18.1)   | 1.2 (0.6, 2.4)  | NA              | 0.9 (0.4, 2)   | 0.6 (0.3, 1.6)  | 0.6 (0.3, 1.2)  | 0.6 (0.3, 1.2)  |
| Edge (open)     | 0.12   | 6.6 (0.9, 50.2)  | 5.6 (1, 32)      | 3.3 (0.6, 19.1) | 1.3 (0.7, 2.2)  | 1.1 (0.5, 2.4)  | NA             | 0.7 (0.3, 1.6)  | 0.6 (0.3, 1.1)  | 0.6 (0.3, 1.1)  |
| Eucalypt (1-7y) | 0.17   | 9.3 (1.2, 71.8)* | 7.9 (1.3, 46.1)* | 4.6 (0.8, 28.1) | 1.8 (0.9, 3.7)  | 1.5 (0.6, 3.7)  | 1.4 (0.6, 3.1) | NA              | 0.9 (0.4, 1.9)  | 0.9 (0.4, 1.8)  |
| Farm-stream     | 0.11   | 10.8 (1.4, 81)*  | 9.1 (1.6, 51.5)* | 5.4 (0.9, 30.8) | 2.1 (1.2, 3.5)* | 1.8 (0.8, 3.9)  | 1.6 (0.9, 3)   | 1.2 (0.5, 2.5)  | NA              | 1.0 (0.5, 1.8)  |
| Edge (forest)   | 0.09   | 10.9 (1.4, 82)*  | 9.2 (1.7, 51.5)* | 5.4 (1, 30.8)   | 2.1 (1.2, 3.6)* | 1.8 (0.8, 3.9)  | 1.6 (0.9, 3.1) | 1.2 (0.5, 2.5)  | 1.0 (0.6, 1.9)  | NA              |

## Fox DOUG

day ( $n_{\text{observed}} = 187$ )

| variable                      | avail. | Farmland          | Reservoir/dam   | Eucalypt (7-35y) | Road            | Edge (forest)   | Riparian (<1y)  | Heath (7-35y)  | Eucalypt (<1y)  |
|-------------------------------|--------|-------------------|-----------------|------------------|-----------------|-----------------|-----------------|----------------|-----------------|
| Riparian (7-35y) <sup>a</sup> | 0.02   |                   |                 |                  |                 |                 |                 |                |                 |
| Farmland                      | 0.09   | NA                | 0.9 (0.1, 8.5)  | 0.3 (0.1, 1.1)   | 0.2 (0.1, 0.7)* | 0.2 (0.1, 0.7)* | 0.2 (0, 0.6)*   | 0.2 (0, 0.6)*  | 0.1 (0, 0.2)*   |
| Reservoir/dam                 | 0.02   | 1.2 (0.1, 11.3)   | NA              | 0.4 (0, 2.9)     | 0.2 (0, 1.8)    | 0.2 (0, 1.8)    | 0.2 (0, 1.5)    | 0.2 (0, 1.5)   | 0.1 (0, 0.6)*   |
| Eucalypt(7-35y)               | 0.19   | 3.1 (0.9, 10.9)   | 2.7 (0.3, 20.9) | NA               | 0.6 (0.3, 1.2)  | 0.6 (0.3, 1.4)  | 0.5 (0.2, 1.1)  | 0.5 (0.2, 1.2) | 0.2 (0.1, 0.4)* |
| Road                          | 0.12   | 4.9 (1.4, 17.4)*  | 4.3 (0.6, 33.3) | 1.6 (0.8, 3.1)   | NA              | 1.0 (0.4, 2.3)  | 0.8 (0.4, 1.8)  | 0.7 (0.3, 1.9) | 0.4 (0.2, 0.6)* |
| Edge (forest)                 | 0.05   | 5.2 (1.4, 19.9)*  | 4.5 (0.6, 37)   | 1.7 (0.7, 4)     | 1.1 (0.4, 2.5)  | NA              | 0.9 (0.3, 2.2)  | 0.8 (0.3, 2.3) | 0.4 (0.2, 0.8)* |
| Riparian (<1y)                | 0.08   | 6 (1.6, 22.1)*    | 5.2 (0.6, 41.4) | 1.9 (0.9, 4.2)   | 1.2 (0.6, 2.6)  | 1.1 (0.4, 2.9)  | NA              | 0.9 (0.3, 2.5) | 0.4 (0.2, 0.8)* |
| Heath (7-35y)                 | 0.05   | 6.6 (1.6, 27.8)*  | 5.8 (0.7, 49.9) | 2.1 (0.9, 5.4)   | 1.3 (0.5, 3.4)  | 1.3 (0.4, 3.8)  | 1.1 (0.4, 3.1)  | NA             | 0.5 (0.2, 1.2)  |
| Eucalypt (<1y)                | 0.4    | 13.8 (4.2, 45.3)* | 12 (1.6, 89.2)* | 4.4 (2.6, 7.7)*  | 2.8 (1.6, 4.8)* | 2.7 (1.2, 5.7)* | 2.3 (1.2, 4.3)* | 2.1 (0.9, 5)   | NA              |

night ( $n_{\text{observed}} = 296$ )

| variable                      | avail. | Eucalypt (7-35y) | Farm-stream      | Riparian (<1y)  | Farmland        | Eucalypt (<1y)  | Road            | Edge (forest)   | Reservoir/dam   | Edge (open)     |
|-------------------------------|--------|------------------|------------------|-----------------|-----------------|-----------------|-----------------|-----------------|-----------------|-----------------|
| Riparian (7-35y) <sup>a</sup> | 0.03   |                  |                  |                 |                 |                 |                 |                 |                 |                 |
| Eucalypt (7-35y)              | 0.17   | NA               | 1.0 (0.3, 3.3)   | 0.8 (0.4, 1.8)  | 0.5 (0.3, 0.8)* | 0.4 (0.2, 0.7)* | 0.3 (0.2, 0.6)* | 0.3 (0.1, 0.5)* | 0.3 (0.1, 0.5)* | 0.2 (0.1, 0.4)* |
| Farm-stream                   | 0.02   | 1.0 (0.3, 3.6)   | NA               | 0.9 (0.2, 3.3)  | 0.5 (0.2, 1.6)  | 0.4 (0.1, 1.4)  | 0.4 (0.1, 1.2)  | 0.3 (0.1, 1)*   | 0.3 (0.1, 0.9)* | 0.2 (0.1, 0.7)* |
| Riparian (<1y)                | 0.06   | 1.2 (0.6, 2.6)   | 1.2 (0.3, 4.3)   | NA              | 0.6 (0.3, 1.2)  | 0.5 (0.2, 0.9)* | 0.4 (0.2, 0.9)* | 0.3 (0.1, 0.7)* | 0.3 (0.1, 0.7)* | 0.3 (0.1, 0.5)* |
| Farmland                      | 0.25   | 2.1 (1.3, 3.6)*  | 2 (0.6, 6.6)     | 1.8 (0.9, 3.6)  | NA              | 0.8 (0.6, 1.3)  | 0.7 (0.5, 1.2)  | 0.6 (0.3, 0.9)* | 0.5 (0.3, 0.9)* | 0.4 (0.3, 0.7)* |
| Eucalypt (<1y)                | 0.24   | 2.5 (1.5, 4.2)*  | 2.4 (0.7, 8)     | 2.1 (1.1, 4.1)* | 1.2 (0.8, 1.8)  | NA              | 0.9 (0.6, 1.3)  | 0.7 (0.4, 1.1)  | 0.6 (0.4, 1.1)  | 0.5 (0.3, 0.9)* |
| Road                          | 0.1    | 2.9 (1.7, 5)*    | 2.8 (0.8, 9.3)   | 2.4 (1.2, 5)*   | 1.4 (0.9, 2.2)  | 1.1 (0.7, 1.8)  | NA              | 0.8 (0.5, 1.4)  | 0.7 (0.4, 1.3)  | 0.6 (0.4, 1)    |
| Edge (forest)                 | 0.05   | 3.7 (2.1, 6.8)*  | 3.6 (1.1, 12)*   | 3.1 (1.4, 6.7)* | 1.7 (1.1, 2.9)* | 1.5 (0.9, 2.4)  | 1.3 (0.7, 2.2)  | NA              | 0.9 (0.5, 1.8)  | 0.8 (0.5, 1.4)  |
| Reservoir/dam                 | 0.04   | 4 (2.1, 7.8)*    | 3.8 (1.1, 13.2)* | 3.3 (1.5, 7.5)* | 1.9 (1.1, 3.2)* | 1.6 (0.9, 2.8)  | 1.4 (0.7, 2.5)  | 1.1 (0.6, 2)    | NA              | 0.8 (0.5, 1.5)  |
| Edge (open)                   | 0.06   | 4.7 (2.7, 8.5)*  | 4.5 (1.4, 15.1)* | 3.9 (1.8, 8.4)* | 2.2 (1.4, 3.5)* | 1.9 (1.2, 3)*   | 1.6 (1, 2.7)    | 1.3 (0.7, 2.2)  | 1.2 (0.6, 2.2)  | NA              |

<sup>a</sup> This habitat was available but never used and therefore had to be dropped from the analysis

## Fox 4400

*day* (n<sub>observed</sub> = 240)

| variable         | avail. | Reservoir/dam    | Farmland        | Road            | Plantation      | Farm-stream    | Eucalypt (7-35y) | Eucalypt (>35y) | Edge (open)     | Edge (forest)   |
|------------------|--------|------------------|-----------------|-----------------|-----------------|----------------|------------------|-----------------|-----------------|-----------------|
| Reservoir/dam    | 0.04   | NA               | 0.9 (0.3, 2.3)  | 0.7 (0.2, 2.1)  | 0.6 (0.2, 2.2)  | 0.5 (0.2, 1.9) | 0.3 (0.1, 0.9)*  | 0.3 (0.1, 0.8)* | 0.2 (0.1, 0.7)* | 0.2 (0.1, 0.7)* |
| Farmland         | 0.35   | 1.2 (0.4, 3.2)   | NA              | 0.8 (0.4, 1.5)  | 0.7 (0.3, 1.8)  | 0.6 (0.3, 1.4) | 0.3 (0.2, 0.7)*  | 0.3 (0.2, 0.6)* | 0.3 (0.2, 0.5)* | 0.3 (0.2, 0.4)* |
| Road             | 0.06   | 1.5 (0.5, 4.8)   | 1.3 (0.7, 2.6)  | NA              | 0.9 (0.3, 2.6)  | 0.8 (0.3, 2.2) | 0.4 (0.2, 1)     | 0.4 (0.2, 0.9)* | 0.4 (0.2, 0.8)* | 0.4 (0.2, 0.7)* |
| Plantation       | 0.05   | 1.6 (0.5, 5.8)   | 1.4 (0.6, 3.4)  | 1.1 (0.4, 3)    | NA              | 0.9 (0.3, 2.8) | 0.5 (0.2, 1.2)   | 0.5 (0.2, 1)    | 0.4 (0.1, 1)*   | 0.4 (0.2, 0.9)* |
| Farm-stream      | 0.03   | 1.9 (0.5, 6.7)   | 1.6 (0.7, 3.7)  | 1.2 (0.4, 3.4)  | 1.2 (0.4, 3.7)  | NA             | 0.5 (0.2, 1.5)   | 0.5 (0.2, 1.4)  | 0.4 (0.2, 1.1)  | 0.4 (0.2, 1.1)  |
| Eucalypt (7-35y) | 0.1    | 3.5 (1.1, 11.3)* | 3 (1.4, 6.4)*   | 2.3 (1, 5.7)    | 2.2 (0.9, 5.6)  | 1.9 (0.7, 5.5) | NA               | 1.0 (0.6, 1.7)  | 0.8 (0.4, 1.9)  | 0.8 (0.4, 1.8)  |
| Eucalypt (>35y)  | 0.27   | 3.6 (1.2, 10.2)* | 3 (1.7, 5.3)*   | 2.3 (1.1, 5)*   | 2.2 (1, 5)      | 1.9 (0.7, 4.9) | 1.0 (0.6, 1.7)   | NA              | 0.8 (0.4, 1.6)  | 0.8 (0.5, 1.5)  |
| Edge (open)      | 0.05   | 4.3 (1.5, 12.6)* | 3.7 (2.2, 6.2)* | 2.8 (1.3, 6.1)* | 2.6 (1, 6.8)*   | 2.3 (0.9, 5.8) | 1.2 (0.5, 2.7)   | 1.2 (0.6, 2.3)  | NA              | 1.0 (0.6, 1.8)  |
| Edge (forest)    | 0.06   | 4.3 (1.5, 12.4)* | 3.7 (2.3, 6.1)* | 2.8 (1.4, 6)*   | 2.7 (1.1, 6.6)* | 2.3 (0.9, 5.7) | 1.2 (0.6, 2.6)   | 1.2 (0.7, 2.2)  | 1.0 (0.6, 1.8)  | NA              |

*night* (n<sub>observed</sub> = 765)

| variable         | avail. | Plantation       | Reservoir/dam   | Eucalypt (7-35y) | Eucalypt (>35y) | Road            | Edge (open)     | Edge (forest)   | Farmland        | Farm-stream     |
|------------------|--------|------------------|-----------------|------------------|-----------------|-----------------|-----------------|-----------------|-----------------|-----------------|
| Plantation       | 0.04   | NA               | 0.4 (0.2, 1)    | 0.4 (0.2, 0.9)*  | 0.4 (0.2, 0.8)* | 0.3 (0.2, 0.6)* | 0.3 (0.1, 0.6)* | 0.3 (0.1, 0.6)* | 0.3 (0.1, 0.5)* | 0.2 (0.1, 0.4)* |
| Reservoir/dam    | 0.02   | 2.2 (1, 5.2)     | NA              | 1.0 (0.5, 2.1)   | 0.9 (0.5, 1.6)  | 0.7 (0.4, 1.3)  | 0.7 (0.3, 1.3)  | 0.6 (0.3, 1.2)  | 0.6 (0.3, 1.1)  | 0.4 (0.2, 0.8)* |
| Eucalypt (7-35y) | 0.04   | 2.3 (1.1, 4.9)*  | 1.0 (0.5, 2.2)  | NA               | 0.9 (0.5, 1.5)  | 0.7 (0.4, 1.2)  | 0.7 (0.4, 1.3)  | 0.7 (0.4, 1.2)  | 0.6 (0.4, 1.1)  | 0.4 (0.2, 0.8)* |
| Eucalypt (>35y)  | 0.13   | 2.5 (1.3, 4.9)*  | 1.1 (0.6, 2.1)  | 1.1 (0.7, 1.8)   | NA              | 0.8 (0.5, 1.2)  | 0.8 (0.5, 1.2)  | 0.7 (0.5, 1.1)  | 0.7 (0.5, 1)*   | 0.5 (0.3, 0.8)* |
| Road             | 0.06   | 3.3 (1.7, 6.6)*  | 1.5 (0.8, 2.8)  | 1.4 (0.8, 2.6)   | 1.3 (0.9, 2)    | NA              | 1.0 (0.6, 1.5)  | 0.9 (0.6, 1.5)  | 0.9 (0.6, 1.2)  | 0.6 (0.4, 1)*   |
| Edge (open)      | 0.07   | 3.4 (1.7, 6.7)*  | 1.5 (0.8, 2.9)  | 1.5 (0.8, 2.7)   | 1.3 (0.9, 2.1)  | 1.0 (0.7, 1.5)  | NA              | 1.0 (0.6, 1.5)  | 0.9 (0.7, 1.2)  | 0.6 (0.4, 1)*   |
| Edge (forest)    | 0.06   | 3.5 (1.7, 7)*    | 1.6 (0.8, 3)    | 1.5 (0.8, 2.8)   | 1.4 (0.9, 2.1)  | 1.1 (0.7, 1.6)  | 1.0 (0.7, 1.6)  | NA              | 0.9 (0.7, 1.3)  | 0.7 (0.4, 1)    |
| Farmland         | 0.54   | 3.7 (2, 7.1)*    | 1.7 (0.9, 3)    | 1.6 (0.9, 2.8)   | 1.5 (1, 2.1)*   | 1.1 (0.8, 1.6)  | 1.1 (0.8, 1.5)  | 1.1 (0.8, 1.5)  | NA              | 0.7 (0.5, 1)*   |
| Farm-stream      | 0.04   | 5.3 (2.6, 10.8)* | 2.4 (1.2, 4.6)* | 2.3 (1.2, 4.4)*  | 2.1 (1.3, 3.4)* | 1.6 (1, 2.5)*   | 1.6 (1, 2.4)*   | 1.5 (1, 2.4)    | 1.4 (1, 2)*     | NA              |

**Supplementary Table S5.** Procedure and permit details for red fox *Vulpes vulpes* research in the Otway and Annya regions, Victoria, Australia.

| Item                                                                                     | Otway                                                                                                                                                                                                                                                                                                                                                                                                                                                       | Annya                                                                                                                        |
|------------------------------------------------------------------------------------------|-------------------------------------------------------------------------------------------------------------------------------------------------------------------------------------------------------------------------------------------------------------------------------------------------------------------------------------------------------------------------------------------------------------------------------------------------------------|------------------------------------------------------------------------------------------------------------------------------|
| Trap-check frequency                                                                     | 12 hour (traps were checked more frequently in hot or inclement weather)                                                                                                                                                                                                                                                                                                                                                                                    | 24 hour (traps were checked more frequently in hot or inclement weather)                                                     |
| Sedation                                                                                 | 0.05 mg/kg medetomidine (Domitor, Zoetis Australia) and 3mg/kg teletamine-zolazepam (Zoletil 100, Zoetis Australia)                                                                                                                                                                                                                                                                                                                                         | 0.05 mg/kg medetomidine (Domitor, Zoetis Australia)                                                                          |
| Sedation reversal agent                                                                  | 0.025 mg/kg atipamezole (Antisedan, Zoetis Australia)                                                                                                                                                                                                                                                                                                                                                                                                       | 0.025 mg/kg atipamezole (Antisedan, Zoetis Australia)                                                                        |
| GPS collar specifications                                                                | 2.7 – 4.2 kg foxes: 134 g GPS collar (Telemetry Solutions <i>Quantum 4000E Small Collar</i> with remote download, drop-off mechanism and activity sensor, <a href="http://www.telemetrysolutions.com">www.telemetrysolutions.com</a> )<br>≥ 4.3 kg foxes: 215 g GPS collar (FollowIt AB <i>Tellus Ultra Light GPS collar</i> with remote UHF & GSM download, drop-off mechanism and activity sensor, <a href="http://www.followit.se">www.followit.se</a> ) | > 4.0 kg foxes: 120 g GPS collar with drop-off mechanism (Sirtrack, <a href="http://www.sirtrack.com">www.sirtrack.com</a> ) |
| GPS fix schedule                                                                         | <i>Session one:</i> rotating variable schedule (to produce 36 fixes over 12 days at 2.6 hour intervals), interspersed by 24 hour periods of intense data collection at 15 min intervals.<br><i>Sessions two and three:</i> 30 min intervals                                                                                                                                                                                                                 | <i>Sessions four and five:</i> 60 min intervals (from mid-January 2015)                                                      |
| Data retrieval                                                                           | <i>Telemetry Solutions collars:</i> via UHF remote download and/or direct download after collar recovery.<br><i>Followit collars:</i> via UHF remote download, GSM mobile signal and/or direct download after collar recovery                                                                                                                                                                                                                               | <i>Sirtrack collars:</i> direct download after collar recovery                                                               |
| GPS collar drop-off                                                                      | <i>Telemetry Solutions collars:</i> scheduled in advance based on predicted collar battery life<br><i>Followit collars:</i> triggered remotely via UHF when low-battery signal received                                                                                                                                                                                                                                                                     | <i>Sirtrack collars:</i> scheduled in advance for 31 June 2015                                                               |
| Data screening. Fixes were removed if, from a window of 10 fixes, they were:             | <i>Session one (15 min intervals):</i> >2500 m from median or >1500 m from mean<br><i>Sessions two and three (30 min intervals):</i> >5000 m from median or > 3000 m from mean                                                                                                                                                                                                                                                                              | <i>Sessions four and five (60 min intervals):</i> >10000 m from median or > 6000 m from mean                                 |
| Animal Ethics approval                                                                   | University of Melbourne Animal Ethics Committee (AEC 1011632 and AEC 132854)                                                                                                                                                                                                                                                                                                                                                                                | Department of Environment, Land, Water and Planning Animal Ethics Committee (AEC 11/22)                                      |
| Research permits (Victorian Government Department of Environment and Primary Industries) | Research permits 10005514 and 10006882                                                                                                                                                                                                                                                                                                                                                                                                                      | Research permit 10007449                                                                                                     |
| Pest animal permit                                                                       | RE71                                                                                                                                                                                                                                                                                                                                                                                                                                                        | RE84                                                                                                                         |

**Supplementary Table S6.** Habitat types in study landscape.

The landscape was categorised into 20 distinct habitat types according to a classification hierarchy, with land that was not identified as the first habitat type being identified as one of the subsequent habitat types. All mapping data were obtained from [www.data.vic.gov.au](http://www.data.vic.gov.au) unless otherwise specified. *Derivation* specifies the map layer name and subsequent modifications using ArcMap 10.2.1 (ESRI 2014)

| Habitat type                | Description                                                                                          | Derivation                                                                                                                                                                                                                                                                                                                                                                                          |
|-----------------------------|------------------------------------------------------------------------------------------------------|-----------------------------------------------------------------------------------------------------------------------------------------------------------------------------------------------------------------------------------------------------------------------------------------------------------------------------------------------------------------------------------------------------|
| Urban                       | Land within the ‘urban-residential’ layer or within 20 m of a house or building outside this area    | LANDUSE100 (clipped to urban-residential) (+ 20 m buffer)<br>VMFEAT_BUILDING_POINT (+ 20 m buffer)                                                                                                                                                                                                                                                                                                  |
| Road                        | Land within 20 m of a road                                                                           | TR_ROAD (+ 20 m buffer)                                                                                                                                                                                                                                                                                                                                                                             |
| Reservoir/dam/<br>waterbody | Land identified as a waterbody or within 20 m of a waterbody                                         | HY_WATER_AREA_POLYGON<br>(+ 20 m buffer)                                                                                                                                                                                                                                                                                                                                                            |
| Edge (open)                 | Land without tree cover but within 20 m of an area with tree cover                                   | TREE_DENSITY – scattered<br>TREE_DENSITY – medium<br>TREE_DENSITY – dense<br>LANDUSE_2014<br>subset to LU_Desc = Softwood<br>Plantation, Hardwood Plantation, or<br>Forestry (Commercial Timber<br>Production)<br>We aggregated these four layers to<br>obtain a ‘tree cover’ layer. We then<br>created a 20m-wide buffer along the<br>outside of the tree cover layer to identify<br>‘edge (open)’ |
| Edge (forest)               | Land with tree cover (plantation or native) but within 20 m of an area without tree/plantation cover | Using the aggregated tree cover layer,<br>we created a 20 m wide buffer along the<br>inside to identify ‘edge (forest)’                                                                                                                                                                                                                                                                             |
| Plantation                  | Land with commercial plantation (softwood or hardwood) that was further than 20 m from an open edge. | LANDUSE_2014 subset to LU_Desc =<br>Softwood Plantation, Hardwood<br>Plantation, or Forestry (Commercial<br>Timber Production)                                                                                                                                                                                                                                                                      |

[continued next page]

Forest (12 types):

- Recently burnt heathy woodland
- Young heathy woodland
- Mid-age heathy woodland
- Long-unburnt heathy woodland
- Recently-burnt eucalypt forest
- Young eucalypt forest
- Mid-age eucalypt forest
- Long-unburnt eucalypt forest
- Recently-burnt riparian forest
- Young riparian forest
- Mid-age riparian forest
- Long-unburnt riparian forest

Land within the tree cover layer that was further than 20 m from an open edge. Forest was grouped into three vegetation types according to ecological vegetation class (EVC) and landscape position.

The time since fire (adjusted for data collection date) was also determined.

Native Vegetation - Modelled 2005 Ecological Vegetation Classes (with Bioregional Conservation Status)

Time since fire [provided by the Department of Environment, Land, Water and Planning]

We clipped these layers so that their extent matched that previously identified as having non-plantation tree cover that was > 20 m from the tree edge. We then grouped EVCs into three broad categories:

- eucalypt forest/woodland
- heathy woodland/heath
- riparian forest/woodland

And time since fire into four categories:

- recently burnt (< 1 year post-fire)
- young (1 - 7 years post-fire)
- mid-age (7 - 35 years post-fire)
- long-unburnt (> 35 years post-fire).

These layers were specific to each fox so that age classes were appropriate for the tracking period.

Farm stream

Land not identified as treed and within 20 m of a stream

HY\_WATERCOURSE (+ 20 m buffer)

Farmland

Land not identified as treed and not falling within any of the previous categories (visually checked to confirm the vast majority was farmland)

**Supplementary Table S7.** R packages and citations for GPS data analysis.

| Package                           | Citation                                                                                                                                                                                                                             |
|-----------------------------------|--------------------------------------------------------------------------------------------------------------------------------------------------------------------------------------------------------------------------------------|
| General data manipulation         |                                                                                                                                                                                                                                      |
| plyr                              | Wickham H. (2011). The split-apply-combine strategy for data analysis. <i>Journal of Statistical Software</i> , 40(1), 1-29. URL: <a href="http://www.jstatsoft.org/v40/i01/">http://www.jstatsoft.org/v40/i01/</a> .                |
| raster                            | Hijmans RJ. (2015). raster: Geographic Data Analysis and Modeling. R package version 2.5-2. <a href="https://CRAN.R-project.org/package=raster">https://CRAN.R-project.org/package=raster</a>                                        |
| rgdal                             | Bivand R, Keitt T, Rowlingson B. (2015). rgdal: Bindings for the Geospatial Data Abstraction Library. R package version 1.1-3. <a href="https://CRAN.R-project.org/package=rgdal">https://CRAN.R-project.org/package=rgdal</a>       |
| rgeos                             | Bivand R, Rundel C. (2015). rgeos: Interface to Geometry Engine - Open Source (GEOS). R package version 0.3-15. <a href="https://CRAN.R-project.org/package=rgeos">https://CRAN.R-project.org/package=rgeos</a>                      |
| Broad-scale resource availability |                                                                                                                                                                                                                                      |
| adehabitatHR                      | Calenge C. (2006) The package adehabitat for the R software: a tool for the analysis of space and habitat use by animals. <i>Ecological Modelling</i> , 197, 516-519                                                                 |
| ggbiplot                          | Vu VQ. (2011). ggbiplot: A ggplot2 based biplot. R package version 0.55. <a href="http://github.com/vqv/ggbiplot">http://github.com/vqv/ggbiplot</a>                                                                                 |
| SpatialTools                      | French J. (2015). SpatialTools: Tools for Spatial Data Analysis. R package version 1.0.2. <a href="https://CRAN.R-project.org/package=SpatialTools">https://CRAN.R-project.org/package=SpatialTools</a>                              |
| Broad-scale habitat selection     |                                                                                                                                                                                                                                      |
| BBMM                              | Nielson RM, Sawyer H, McDonald T.L. (2013) BBMM: Brownian bridge movement model. R package version 3.0                                                                                                                               |
| boot                              | Canty A, Ripley B (2015). boot: Bootstrap R (S-Plus) Functions. R package version 1.3-17. Davison AC, Hinkley DV. (1997) <i>Bootstrap Methods and Their Applications</i> . Cambridge University Press, Cambridge. ISBN 0-521-57391-2 |
| adehabitatHR & adehabitatLT       | Calenge C. (2006) The package adehabitat for the R software: a tool for the analysis of space and habitat use by animals. <i>Ecological Modelling</i> , 197, 516-519                                                                 |
| maptools                          | Bivand R, Lewin-Koh N. (2015). maptools: Tools for Reading and Handling Spatial Objects. R package version 0.8-37. <a href="https://CRAN.R-project.org/package=maptools">https://CRAN.R-project.org/package=maptools</a>             |
| SpatialTools                      | French J. (2015). SpatialTools: Tools for Spatial Data Analysis. R package version 1.0.2. <a href="https://CRAN.R-project.org/package=SpatialTools">https://CRAN.R-project.org/package=SpatialTools</a>                              |
| Fine-scale habitat selection      |                                                                                                                                                                                                                                      |
| adehabitatLT                      | Calenge C. (2006) The package adehabitat for the R software: a tool for the analysis of space and habitat use by animals. <i>Ecological Modelling</i> , 197, 516-519                                                                 |
| Hmisc                             | Harrell FE with contributions from Dupont C and many others. (2015). Hmisc: Harrell Miscellaneous. R package version 3.17-1. <a href="https://CRAN.R-project.org/package=Hmisc">https://CRAN.R-project.org/package=Hmisc</a>         |
| maptools                          | Bivand R, Lewin-Koh N. (2015). maptools: Tools for Reading and Handling Spatial Objects. R package version 0.8-37. <a href="https://CRAN.R-project.org/package=maptools">https://CRAN.R-project.org/package=maptools</a>             |
| sp                                | Pebesma, EJ, Bivand RS. (2005). Classes and methods for spatial data in R. <i>R News</i> 5 (2), <a href="http://cran.r-project.org/doc/Rnews/">http://cran.r-project.org/doc/Rnews/</a>                                              |

---

|             |                                                                                                                                                                                                                                                                                                                        |
|-------------|------------------------------------------------------------------------------------------------------------------------------------------------------------------------------------------------------------------------------------------------------------------------------------------------------------------------|
| support.CEs | Aizaki H (2012). Basic functions for supporting an implementation of choice experiments in R. Journal of Statistical Software, Code Snippets, 50(2), 1-24.<br>URL <a href="http://www.jstatsoft.org/v50/c02/">http://www.jstatsoft.org/v50/c02/</a>                                                                    |
| survival    | Therneau T (2015). A Package for Survival Analysis in S version 2.38,<br>< <a href="http://CRAN.R-project.org/package=survival">http://CRAN.R-project.org/package=survival</a> >.<br>Therneau TM, Grambsch PM (2000). <i>Modeling Survival Data: Extending the Cox Model</i> . Springer, New York. ISBN 0-387-98784-3. |

---
